# Supplementary material for: Transcriptome analysis and transcription factors responsive to drought stress in Hibiscus cannabinus
Source: PeerJ. 2020 Feb 25;8:e8470. doi: 10.7717/peerj.8470 (PMC7047868; doi:10.7717/peerj.8470)
Supplement: Supplemental Information 6 [file peerj-08-8470-s006.xlsx]

## Sheet: DvsC.DEG_KEGG_pathway_enrichmen
#Term	Database	ID	Input number	Background number	P-Value	Corrected P-Value	Input	Hyperlink
Photosynthesis	KEGG PATHWAY	ko00195	55	231	4.6785e-21	5.2867e-19	Cluster-20186.55259|Cluster-20186.55014|Cluster-20186.57485|Cluster-20186.56966|Cluster-20186.59025|Cluster-20186.56599|Cluster-20186.55559|Cluster-20186.55154|Cluster-20186.53194|Cluster-20186.55313|Cluster-20186.43097|Cluster-20186.54573|Cluster-20186.55429|Cluster-20186.56380|Cluster-20186.54424|Cluster-20186.55321|Cluster-20186.54423|Cluster-20186.58716|Cluster-20186.55369|Cluster-20186.55425…	http://www.genome.jp/kegg-bin/show_pathway?ko00195/K02694%09red/K02695%09red/K02692%09red/K02693%09red/K02698%09red/K02699%09red/K02113%09red/K02115%09red/K02701%09red/K02641%09red/K02721%09red/K02723%09red/K02717%09red/K02109%09red/K08905%09red/K08902%09red/K08903%09red/K14332%09red/K08901%09red/K02636%09red/K03542%09red/K03541%09red/K02716%09red/K02638%09red/K02639%09red
Photosynthesis - antenna proteins	KEGG PATHWAY	ko00196	23	81	6.59379e-11	3.72549e-09	Cluster-20186.55270|Cluster-20186.56903|Cluster-20186.55396|Cluster-20186.55395|Cluster-20186.55173|Cluster-20186.55623|Cluster-20186.55212|Cluster-20186.55541|Cluster-20186.55421|Cluster-20186.55791|Cluster-20186.70621|Cluster-20186.55350|Cluster-20186.55225|Cluster-20186.58429|Cluster-20186.55630|Cluster-20186.55147|Cluster-20186.55449|Cluster-20186.54650|Cluster-20186.55306|Cluster-20186.55355…	http://www.genome.jp/kegg-bin/show_pathway?ko00196/K08914%09red/K08908%09red/K08909%09red/K08915%09red/K08907%09red/K08917%09red/K08916%09red/K08911%09red/K08910%09red/K08913%09red/K08912%09red
Nitrogen metabolism	KEGG PATHWAY	ko00910	28	144	1.1606e-09	4.37159e-08	Cluster-20186.60054|Cluster-20186.57456|Cluster-20186.57008|Cluster-20186.55707|Cluster-20186.55551|Cluster-20186.55608|Cluster-20186.60709|Cluster-20186.55340|Cluster-20186.55366|Cluster-20186.26940|Cluster-20186.45606|Cluster-20186.58670|Cluster-20186.56532|Cluster-20186.53973|Cluster-20186.54178|Cluster-20186.55568|Cluster-20186.75946|Cluster-20186.53544|Cluster-20186.69095|Cluster-20186.58970…	http://www.genome.jp/kegg-bin/show_pathway?ko00910/K01673%09red/K01674%09red/K00284%09red/K10534%09red/K01915%09red/K00366%09red
Plant hormone signal transduction	KEGG PATHWAY	ko04075	99	1204	2.25253e-08	6.36341e-07	Cluster-20186.3068|Cluster-20186.46068|Cluster-20186.54204|Cluster-20186.54205|Cluster-20186.94384|Cluster-20186.94383|Cluster-20186.94381|Cluster-20186.78711|Cluster-20186.78153|Cluster-20186.86597|Cluster-20186.53557|Cluster-20186.96764|Cluster-20186.66711|Cluster-20186.73134|Cluster-20186.50132|Cluster-20186.94613|Cluster-20186.94612|Cluster-20186.33768|Cluster-20186.33766|Cluster-20186.55248|…	http://www.genome.jp/kegg-bin/show_pathway?ko04075/K14486%09red/K14487%09red/K14484%09red/K14485%09red/K14488%09red/K14489%09red/K14432%09red/K14431%09red/K14514%09red/K14515%09red/K14516%09red/K14494%09red/K14497%09red/K14496%09red/K14490%09red/K14493%09red/K14492%09red/K14499%09red/K16189%09red/K14498%09red/K14500%09red/K14509%09red/K14508%09red/K12126%09red/K13449%09red/K13422%09red
Carotenoid biosynthesis	KEGG PATHWAY	ko00906	22	129	4.99828e-07	1.12961e-05	Cluster-20186.6931|Cluster-27299.0|Cluster-20186.60069|Cluster-20186.55504|Cluster-20186.65774|Cluster-20186.66229|Cluster-20186.60103|Cluster-20186.98181|Cluster-20186.54338|Cluster-20186.51273|Cluster-20186.66081|Cluster-20186.91996|Cluster-20186.11445|Cluster-20186.12729|Cluster-20186.11130|Cluster-20186.46145|Cluster-20186.56336|Cluster-20186.30926|Cluster-20186.95704|Cluster-20186.55948|Clus…	http://www.genome.jp/kegg-bin/show_pathway?ko00906/K09840%09red/K15747%09red/K09843%09red/K17911%09red/K09838%09red/K15746%09red/K09839%09red/K06444%09red
Porphyrin and chlorophyll metabolism	KEGG PATHWAY	ko00860	24	155	7.3148e-07	1.37762e-05	Cluster-20186.53964|Cluster-20186.58897|Cluster-20186.44800|Cluster-20186.61817|Cluster-20186.56968|Cluster-20186.52543|Cluster-20186.55218|Cluster-20186.59403|Cluster-20186.59402|Cluster-20186.57351|Cluster-20186.56360|Cluster-20186.48255|Cluster-20186.56277|Cluster-20186.59700|Cluster-20186.48773|Cluster-20186.54279|Cluster-20186.55067|Cluster-20186.55069|Cluster-20186.55303|Cluster-20186.54022…	http://www.genome.jp/kegg-bin/show_pathway?ko00860/K02492%09red/K10960%09red/K03403%09red/K04035%09red/K13606%09red/K18010%09red/K19073%09red/K13600%09red/K13071%09red/K03428%09red/K03404%09red/K03405%09red/K01772%09red/K00218%09red
Glyoxylate and dicarboxylate metabolism	KEGG PATHWAY	ko00630	39	404	1.86252e-05	0.000300664	Cluster-20186.84705|Cluster-20186.56632|Cluster-20186.54782|Cluster-20186.37169|Cluster-20186.55707|Cluster-20186.57008|Cluster-20186.55121|Cluster-20186.55332|Cluster-20186.54715|Cluster-20186.50271|Cluster-20186.57344|Cluster-20186.55366|Cluster-20186.26388|Cluster-20186.53670|Cluster-20186.55409|Cluster-20186.58670|Cluster-20186.72420|Cluster-20186.56006|Cluster-20186.58657|Cluster-20186.70510…	http://www.genome.jp/kegg-bin/show_pathway?ko00630/K03781%09red/K15893%09red/K15919%09red/K11517%09red/K00284%09red/K14272%09red/K01638%09red/K00281%09red/K01681%09red/K00600%09red/K02437%09red/K01602%09red/K00830%09red/K01915%09red/K19269%09red/K00605%09red/K01433%09red/K00026%09red/K01647%09red
Carbon fixation in photosynthetic organisms	KEGG PATHWAY	ko00710	42	466	3.979e-05	0.000562034	Cluster-20186.55137|Cluster-20186.55121|Cluster-20186.55279|Cluster-20186.68580|Cluster-20186.54263|Cluster-20186.54474|Cluster-20186.55074|Cluster-13009.0|Cluster-20186.31304|Cluster-20186.59080|Cluster-20186.55330|Cluster-20186.55332|Cluster-20186.25747|Cluster-20186.52717|Cluster-20186.57064|Cluster-20186.55653|Cluster-20186.55324|Cluster-20186.55188|Cluster-20186.55818|Cluster-20186.55409|Clu…	http://www.genome.jp/kegg-bin/show_pathway?ko00710/K00855%09red/K03841%09red/K14454%09red/K00615%09red/K14272%09red/K01803%09red/K01783%09red/K00134%09red/K01807%09red/K01595%09red/K01623%09red/K00814%09red/K05298%09red/K01100%09red/K00927%09red/K00029%09red/K01602%09red/K00026%09red/K01610%09red
Ascorbate and aldarate metabolism	KEGG PATHWAY	ko00053	21	186	0.000229777	0.00288497	Cluster-20186.59124|Cluster-20186.98318|Cluster-20186.59245|Cluster-20186.59244|Cluster-20186.54468|Cluster-20186.90538|Cluster-20186.60712|Cluster-20186.40296|Cluster-20186.56030|Cluster-20186.58808|Cluster-20186.77781|Cluster-20186.59889|Cluster-20186.55294|Cluster-20186.56191|Cluster-20186.24669|Cluster-20186.55781|Cluster-20186.66227|Cluster-20186.34099|Cluster-20186.59861|Cluster-20186.59703…	http://www.genome.jp/kegg-bin/show_pathway?ko00053/K17744%09red/K16190%09red/K00469%09red/K08232%09red/K00128%09red/K14190%09red/K14085%09red/K00012%09red/K10046%09red/K10047%09red/K00434%09red
Fructose and mannose metabolism	KEGG PATHWAY	ko00051	29	345	0.00157885	0.017841	Cluster-20186.21452|Cluster-20186.71361|Cluster-20186.71362|Cluster-20186.59022|Cluster-20186.55074|Cluster-13009.0|Cluster-20186.31304|Cluster-9715.0|Cluster-20186.55818|Cluster-20186.55188|Cluster-20186.55911|Cluster-20186.59080|Cluster-20186.52340|Cluster-20186.52343|Cluster-20186.55857|Cluster-20186.50215|Cluster-20186.72036|Cluster-20186.49739|Cluster-20186.53238|Cluster-20186.49016|Cluster-…	http://www.genome.jp/kegg-bin/show_pathway?ko00051/K00966%09red/K03841%09red/K00850%09red/K01803%09red/K01805%09red/K00008%09red/K01623%09red/K19355%09red/K17497%09red
Cutin, suberine and wax biosynthesis	KEGG PATHWAY	ko00073	11	87	0.00309825	0.0318274	Cluster-20186.7298|Cluster-20186.7918|Cluster-20186.29794|Cluster-20186.65016|Cluster-20186.55803|Cluster-20186.50456|Cluster-20186.10356|Cluster-14686.0|Cluster-20186.52680|Cluster-20186.104418|Cluster-20186.54018	http://www.genome.jp/kegg-bin/show_pathway?ko00073/K17991%09red/K13356%09red/K15402%09red/K15400%09red/K15404%09red
Galactose metabolism	KEGG PATHWAY	ko00052	22	251	0.00345516	0.0325361	Cluster-20186.21452|Cluster-20186.96806|Cluster-20186.105486|Cluster-20186.5626|Cluster-9715.0|Cluster-20186.73616|Cluster-20186.24554|Cluster-20186.69175|Cluster-20186.12421|Cluster-20186.12422|Cluster-20186.12423|Cluster-20186.20399|Cluster-20186.63006|Cluster-20186.19626|Cluster-20186.44818|Cluster-20186.46186|Cluster-20186.44817|Cluster-20186.61945|Cluster-20186.93292|Cluster-20186.29487|Clus…	http://www.genome.jp/kegg-bin/show_pathway?ko00052/K01193%09red/K00850%09red/K18819%09red/K01784%09red/K07407%09red/K06611%09red/K06617%09red
Starch and sucrose metabolism	KEGG PATHWAY	ko00500	48	735	0.00821051	0.0713683	Cluster-20186.98318|Cluster-20186.55258|Cluster-20186.74456|Cluster-20186.67848|Cluster-20186.12870|Cluster-20186.51185|Cluster-8100.0|Cluster-20186.54668|Cluster-20186.36518|Cluster-20186.69838|Cluster-20186.36566|Cluster-20186.41396|Cluster-20186.61279|Cluster-20186.41395|Cluster-20186.35223|Cluster-20186.77287|Cluster-20186.85342|Cluster-20186.36517|Cluster-20186.34029|Cluster-20186.67475|Clus…	http://www.genome.jp/kegg-bin/show_pathway?ko00500/K01193%09red/K00975%09red/K01177%09red/K08678%09red/K08679%09red/K16055%09red/K00700%09red/K01188%09red/K01810%09red/K00688%09red/K00012%09red/K01087%09red/K00696%09red/K00695%09red
Diterpenoid biosynthesis	KEGG PATHWAY	ko00904	10	89	0.00976011	0.078778	Cluster-20186.74491|Cluster-20186.2328|Cluster-20186.2329|Cluster-20186.14843|Cluster-20186.81004|Cluster-20186.75051|Cluster-20186.96393|Cluster-20186.12220|Cluster-20186.8523|Cluster-20186.4626	http://www.genome.jp/kegg-bin/show_pathway?ko00904/K04125%09red/K05282%09red/K04123%09red
Pentose phosphate pathway	KEGG PATHWAY	ko00030	25	334	0.0119402	0.0899497	Cluster-20186.21452|Cluster-20186.55074|Cluster-13009.0|Cluster-20186.31304|Cluster-20186.55330|Cluster-20186.56381|Cluster-20186.52717|Cluster-20186.57341|Cluster-20186.55324|Cluster-20186.59080|Cluster-9715.0|Cluster-20186.52340|Cluster-20186.52343|Cluster-20186.55857|Cluster-20186.52175|Cluster-20186.56164|Cluster-20186.55818|Cluster-20186.56486|Cluster-20186.55713|Cluster-20186.65743|Cluster-…	http://www.genome.jp/kegg-bin/show_pathway?ko00030/K03841%09red/K00850%09red/K00131%09red/K00615%09red/K01807%09red/K01623%09red/K00616%09red/K01810%09red/K00036%09red/K01783%09red
Circadian rhythm - plant	KEGG PATHWAY	ko04712	21	274	0.0160228	0.113161	Cluster-20186.42543|Cluster-20186.48786|Cluster-20186.42547|Cluster-20186.42544|Cluster-20186.59814|Cluster-20186.63499|Cluster-20186.80595|Cluster-20186.56427|Cluster-20186.58880|Cluster-20186.59811|Cluster-20186.59813|Cluster-20186.38222|Cluster-20186.32338|Cluster-20186.57171|Cluster-20186.39457|Cluster-20186.58852|Cluster-20186.63745|Cluster-20186.64225|Cluster-20186.50050|Cluster-20186.49555…	http://www.genome.jp/kegg-bin/show_pathway?ko04712/K10143%09red/K16222%09red/K12119%09red/K12124%09red/K12118%09red/K12130%09red/K12126%09red/K12133%09red/K12129%09red
Isoquinoline alkaloid biosynthesis	KEGG PATHWAY	ko00950	9	95	0.0339826	0.225884	Cluster-20186.57522|Cluster-20186.90957|Cluster-20186.59874|Cluster-20186.47792|Cluster-20186.47793|Cluster-20186.27280|Cluster-20186.36086|Cluster-4826.0|Cluster-20186.95826	http://www.genome.jp/kegg-bin/show_pathway?ko00950/K00276%09red/K01592%09red/K14454%09red/K00815%09red
Tropane, piperidine and pyridine alkaloid biosynthesis	KEGG PATHWAY	ko00960	9	97	0.0377203	0.229742	Cluster-20186.57522|Cluster-20186.37115|Cluster-20186.90957|Cluster-20186.76190|Cluster-20186.76191|Cluster-20186.59874|Cluster-20186.27280|Cluster-20186.42312|Cluster-20186.36086	http://www.genome.jp/kegg-bin/show_pathway?ko00960/K00276%09red/K14454%09red/K08081%09red/K00815%09red
Phenylpropanoid biosynthesis	KEGG PATHWAY	ko00940	26	394	0.0386292	0.229742	Cluster-20186.59866|Cluster-20186.12870|Cluster-20186.22238|Cluster-20186.69083|Cluster-20186.41395|Cluster-20186.60213|Cluster-20186.22617|Cluster-20186.38638|Cluster-20186.51615|Cluster-20186.14200|Cluster-20186.44966|Cluster-20186.49623|Cluster-20186.48162|Cluster-20186.48160|Cluster-20186.13826|Cluster-20186.55773|Cluster-20186.54393|Cluster-20186.60498|Cluster-20186.45618|Cluster-20186.47988…	http://www.genome.jp/kegg-bin/show_pathway?ko00940/K13065%09red/K10775%09red/K13066%09red/K01188%09red/K00083%09red/K01904%09red/K09755%09red/K00430%09red
Glycolysis / Gluconeogenesis	KEGG PATHWAY	ko00010	42	703	0.0422016	0.238439	Cluster-20186.21452|Cluster-20186.58317|Cluster-20186.55137|Cluster-20186.66371|Cluster-20186.52343|Cluster-20186.55074|Cluster-13009.0|Cluster-20186.31304|Cluster-20186.22492|Cluster-9715.0|Cluster-20186.22490|Cluster-20186.55818|Cluster-20186.90538|Cluster-20186.55713|Cluster-20186.55188|Cluster-20186.54074|Cluster-20186.59080|Cluster-20186.52340|Cluster-20186.84098|Cluster-20186.55857|Cluster-…	http://www.genome.jp/kegg-bin/show_pathway?ko00010/K03841%09red/K00850%09red/K00131%09red/K01689%09red/K00134%09red/K01803%09red/K00121%09red/K00162%09red/K00128%09red/K18857%09red/K01623%09red/K01610%09red/K01810%09red/K00873%09red/K00927%09red/K14085%09red/K03103%09red
Glycine, serine and threonine metabolism	KEGG PATHWAY	ko00260	23	353	0.0549292	0.295091	Cluster-20186.90957|Cluster-20186.56632|Cluster-20186.54782|Cluster-20186.37169|Cluster-20186.54715|Cluster-20186.50271|Cluster-20186.90538|Cluster-20186.72420|Cluster-20186.56006|Cluster-20186.58657|Cluster-20186.27280|Cluster-20186.69904|Cluster-20186.55129|Cluster-20186.58582|Cluster-20186.64094|Cluster-5397.0|Cluster-20186.61947|Cluster-20186.55829|Cluster-5130.0|Cluster-20186.13181|Cluster-2…	http://www.genome.jp/kegg-bin/show_pathway?ko00260/K15893%09red/K00276%09red/K00058%09red/K15919%09red/K14272%09red/K00281%09red/K06001%09red/K00600%09red/K00827%09red/K02437%09red/K00605%09red/K00830%09red/K14085%09red/K00928%09red
Tyrosine metabolism	KEGG PATHWAY	ko00350	14	191	0.0574514	0.295091	Cluster-20186.57522|Cluster-20186.91584|Cluster-20186.95826|Cluster-20186.90957|Cluster-20186.59874|Cluster-20186.83081|Cluster-20186.47792|Cluster-20186.47793|Cluster-20186.27280|Cluster-20186.74159|Cluster-20186.36086|Cluster-20186.76069|Cluster-20186.54903|Cluster-4826.0	http://www.genome.jp/kegg-bin/show_pathway?ko00350/K00276%09red/K14454%09red/K18857%09red/K01592%09red/K00815%09red/K07253%09red/K00121%09red
Vitamin B6 metabolism	KEGG PATHWAY	ko00750	5	45	0.0613642	0.301485	Cluster-20186.23380|Cluster-20186.13889|Cluster-20186.47067|Cluster-20186.57111|Cluster-20186.53806	http://www.genome.jp/kegg-bin/show_pathway?ko00750/K06215%09red/K05275%09red
Arginine biosynthesis	KEGG PATHWAY	ko00220	12	165	0.0776834	0.365759	Cluster-20186.52336|Cluster-20186.55351|Cluster-20186.46714|Cluster-20186.55366|Cluster-20186.63483|Cluster-20186.68580|Cluster-20186.77134|Cluster-20186.53670|Cluster-20186.75946|Cluster-20186.36086|Cluster-20186.55707|Cluster-20186.57008	http://www.genome.jp/kegg-bin/show_pathway?ko00220/K14272%09red/K00814%09red/K14454%09red/K14682%09red/K01915%09red
Alanine, aspartate and glutamate metabolism	KEGG PATHWAY	ko00250	17	261	0.0889275	0.401952	Cluster-20186.54782|Cluster-20186.50271|Cluster-20186.59530|Cluster-20186.75946|Cluster-20186.55351|Cluster-20186.55366|Cluster-20186.68580|Cluster-20186.13181|Cluster-20186.77134|Cluster-20186.30820|Cluster-20186.53670|Cluster-20186.55707|Cluster-20186.58657|Cluster-20186.36086|Cluster-20186.57107|Cluster-20186.40687|Cluster-20186.57008	http://www.genome.jp/kegg-bin/show_pathway?ko00250/K14454%09red/K00294%09red/K01953%09red/K00827%09red/K14272%09red/K00814%09red/K01580%09red/K00830%09red/K01915%09red/K00764%09red
alpha-Linolenic acid metabolism	KEGG PATHWAY	ko00592	13	194	0.107462	0.447267	Cluster-20186.42238|Cluster-20186.60158|Cluster-20186.36849|Cluster-20186.64027|Cluster-20186.95970|Cluster-20186.12217|Cluster-20186.73407|Cluster-20186.50751|Cluster-20186.3367|Cluster-20186.20513|Cluster-20186.20512|Cluster-20186.100786|Cluster-20186.54903	http://www.genome.jp/kegg-bin/show_pathway?ko00592/K05894%09red/K18857%09red/K08241%09red/K00232%09red/K00454%09red/K01723%09red/K10528%09red/K07513%09red
Glutathione metabolism	KEGG PATHWAY	ko00480	20	327	0.108917	0.447267	Cluster-20186.59124|Cluster-20186.54468|Cluster-20186.51871|Cluster-20186.59861|Cluster-20186.56486|Cluster-20186.105384|Cluster-20186.5523|Cluster-20186.50927|Cluster-20186.55514|Cluster-20186.39633|Cluster-20186.41350|Cluster-20186.57269|Cluster-14901.0|Cluster-20186.54536|Cluster-20186.52175|Cluster-20186.51793|Cluster-20186.53923|Cluster-20186.45550|Cluster-20186.56087|Cluster-20186.6025	http://www.genome.jp/kegg-bin/show_pathway?ko00480/K10808%09red/K01255%09red/K00797%09red/K00432%09red/K01581%09red/K00799%09red/K00036%09red/K00434%09red
Steroid biosynthesis	KEGG PATHWAY	ko00100	8	105	0.110827	0.447267	Cluster-20186.38998|Cluster-20186.31537|Cluster-20186.47388|Cluster-20186.35261|Cluster-20186.46625|Cluster-20186.22730|Cluster-20186.51951|Cluster-20186.55423	http://www.genome.jp/kegg-bin/show_pathway?ko00100/K05917%09red/K00511%09red/K08242%09red/K00227%09red/K14423%09red/K00559%09red/K09828%09red
Riboflavin metabolism	KEGG PATHWAY	ko00740	3	25	0.115642	0.450607	Cluster-20186.68387|Cluster-20186.11546|Cluster-20186.46643	http://www.genome.jp/kegg-bin/show_pathway?ko00740/K00793%09red/K14652%09red
Inositol phosphate metabolism	KEGG PATHWAY	ko00562	21	360	0.141314	0.532282	Cluster-20186.50954|Cluster-20186.55122|Cluster-20186.17668|Cluster-20186.14507|Cluster-20186.57004|Cluster-20186.60712|Cluster-20186.68207|Cluster-20186.54201|Cluster-20186.56950|Cluster-20186.77781|Cluster-20186.53238|Cluster-20186.68158|Cluster-20186.61992|Cluster-20186.24669|Cluster-20186.66196|Cluster-20186.34099|Cluster-20186.72597|Cluster-20186.72688|Cluster-20186.22492|Cluster-20186.55188…	http://www.genome.jp/kegg-bin/show_pathway?ko00562/K03103%09red/K01803%09red/K01114%09red/K05857%09red/K00921%09red/K00913%09red/K00469%09red/K10047%09red/K00889%09red
Amino sugar and nucleotide sugar metabolism	KEGG PATHWAY	ko00520	30	543	0.147566	0.537901	Cluster-20186.98318|Cluster-20186.31509|Cluster-20186.55258|Cluster-20186.67848|Cluster-20186.26235|Cluster-20186.54668|Cluster-20186.44224|Cluster-20186.69838|Cluster-20186.99937|Cluster-20186.77287|Cluster-20186.55911|Cluster-20186.24554|Cluster-20186.30833|Cluster-20186.50215|Cluster-20186.72036|Cluster-20186.49739|Cluster-20186.56191|Cluster-20186.58423|Cluster-20186.55008|Cluster-20186.37529…	http://www.genome.jp/kegg-bin/show_pathway?ko00520/K01183%09red/K01209%09red/K00326%09red/K16190%09red/K00975%09red/K08678%09red/K08679%09red/K01836%09red/K00966%09red/K01784%09red/K12446%09red/K01810%09red/K00012%09red/K17497%09red/K10046%09red/K12450%09red
Peroxisome	KEGG PATHWAY	ko04146	24	432	0.172487	0.609095	Cluster-20186.29794|Cluster-20186.54782|Cluster-20186.20513|Cluster-20186.20512|Cluster-20186.100786|Cluster-20186.12990|Cluster-20186.50271|Cluster-20186.12998|Cluster-20186.55528|Cluster-20186.58657|Cluster-14686.0|Cluster-20186.55162|Cluster-20186.56183|Cluster-20186.104418|Cluster-20186.55468|Cluster-20186.35395|Cluster-20186.30687|Cluster-20186.57110|Cluster-20186.60158|Cluster-20186.12217|C…	http://www.genome.jp/kegg-bin/show_pathway?ko04146/K03781%09red/K13356%09red/K13354%09red/K04564%09red/K11517%09red/K13348%09red/K04565%09red/K00232%09red/K00830%09red/K11147%09red/K01897%09red/K07513%09red/K13347%09red
Pyruvate metabolism	KEGG PATHWAY	ko00620	26	485	0.205381	0.700289	Cluster-20186.58317|Cluster-20186.55137|Cluster-20186.84705|Cluster-20186.57064|Cluster-20186.25747|Cluster-20186.90538|Cluster-20186.54074|Cluster-20186.25748|Cluster-20186.84098|Cluster-20186.59703|Cluster-20186.53703|Cluster-20186.59245|Cluster-20186.59244|Cluster-20186.58223|Cluster-20186.40927|Cluster-20186.66371|Cluster-20186.56621|Cluster-20186.75827|Cluster-20186.73431|Cluster-20186.42663…	http://www.genome.jp/kegg-bin/show_pathway?ko00620/K01069%09red/K14085%09red/K01759%09red/K00162%09red/K00128%09red/K01595%09red/K00029%09red/K01610%09red/K01638%09red/K00873%09red/K00026%09red/K18881%09red
Glycerolipid metabolism	KEGG PATHWAY	ko00561	17	303	0.210706	0.700289	Cluster-20186.82242|Cluster-20186.59245|Cluster-20186.59244|Cluster-20186.38166|Cluster-20186.90538|Cluster-20186.58530|Cluster-20186.79243|Cluster-20186.47389|Cluster-20186.57338|Cluster-20186.63906|Cluster-20186.10393|Cluster-20186.57382|Cluster-20186.6842|Cluster-20186.105486|Cluster-20186.59703|Cluster-20186.32450|Cluster-20186.69599	http://www.genome.jp/kegg-bin/show_pathway?ko00561/K15728%09red/K09480%09red/K13523%09red/K14085%09red/K00128%09red/K13508%09red/K00901%09red/K07407%09red/K00630%09red/K00864%09red
Fatty acid degradation	KEGG PATHWAY	ko00071	14	264	0.301934	0.950783	Cluster-20186.91584|Cluster-20186.20512|Cluster-20186.59245|Cluster-20186.59244|Cluster-20186.90538|Cluster-20186.12217|Cluster-20186.60158|Cluster-20186.59703|Cluster-20186.83081|Cluster-20186.20513|Cluster-20186.30687|Cluster-20186.100786|Cluster-20186.54903|Cluster-20186.76069	http://www.genome.jp/kegg-bin/show_pathway?ko00071/K18857%09red/K00128%09red/K00232%09red/K14085%09red/K01897%09red/K00121%09red/K07513%09red
Biosynthesis of unsaturated fatty acids	KEGG PATHWAY	ko01040	9	161	0.302904	0.950783	Cluster-20186.60158|Cluster-20186.69477|Cluster-20186.12217|Cluster-20186.53720|Cluster-20186.102069|Cluster-20186.20513|Cluster-20186.20512|Cluster-20186.100786|Cluster-20186.44363	http://www.genome.jp/kegg-bin/show_pathway?ko01040/K00232%09red/K10256%09red/K07513%09red/K03921%09red/K00507%09red/K10251%09red
Limonene and pinene degradation	KEGG PATHWAY	ko00903	5	83	0.3229	0.986154	Cluster-20186.47120|Cluster-20394.0|Cluster-20186.59703|Cluster-20186.59245|Cluster-20186.59244	http://www.genome.jp/kegg-bin/show_pathway?ko00903/K00128%09red/K00517%09red
Sulfur metabolism	KEGG PATHWAY	ko00920	7	127	0.348147	0.993547	Cluster-20186.56382|Cluster-20186.61046|Cluster-20186.13936|Cluster-20186.95786|Cluster-20186.50894|Cluster-20186.74285|Cluster-20186.37337	http://www.genome.jp/kegg-bin/show_pathway?ko00920/K00392%09red/K05907%09red/K13034%09red/K00860%09red/K13811%09red
One carbon pool by folate	KEGG PATHWAY	ko00670	6	107	0.35275	0.993547	Cluster-20186.55829|Cluster-5130.0|Cluster-20186.70509|Cluster-20186.24153|Cluster-20186.70510|Cluster-20186.37169	http://www.genome.jp/kegg-bin/show_pathway?ko00670/K00600%09red/K01433%09red/K00605%09red/K00604%09red
Tryptophan metabolism	KEGG PATHWAY	ko00380	9	170	0.356704	0.993547	Cluster-20186.59245|Cluster-20186.59244|Cluster-20186.11542|Cluster-20186.56183|Cluster-20186.90538|Cluster-20186.51492|Cluster-20186.45628|Cluster-20186.59703|Cluster-20186.57377	http://www.genome.jp/kegg-bin/show_pathway?ko00380/K03781%09red/K00128%09red/K16903%09red/K11816%09red/K14085%09red/K11821%09red
Monobactam biosynthesis	KEGG PATHWAY	ko00261	2	28	0.368705	0.993547	Cluster-20186.64094|Cluster-20186.95786	http://www.genome.jp/kegg-bin/show_pathway?ko00261/K00928%09red/K13811%09red
Sphingolipid metabolism	KEGG PATHWAY	ko00600	8	151	0.369283	0.993547	Cluster-20186.51243|Cluster-20186.57338|Cluster-20186.39409|Cluster-20186.60886|Cluster-20186.17983|Cluster-20186.105486|Cluster-20186.56053|Cluster-20186.55575	http://www.genome.jp/kegg-bin/show_pathway?ko00600/K04713%09red/K07407%09red/K17108%09red/K12349%09red
Linoleic acid metabolism	KEGG PATHWAY	ko00591	4	71	0.399158	1	Cluster-20186.87856|Cluster-20186.64027|Cluster-20186.42238|Cluster-20186.79163	http://www.genome.jp/kegg-bin/show_pathway?ko00591/K00454%09red/K15718%09red
Cyanoamino acid metabolism	KEGG PATHWAY	ko00460	7	135	0.404248	1	Cluster-20186.41395|Cluster-20186.55829|Cluster-20186.45618|Cluster-20186.12870|Cluster-5130.0|Cluster-20186.50894|Cluster-20186.51615	http://www.genome.jp/kegg-bin/show_pathway?ko00460/K01188%09red/K13034%09red/K00600%09red
ABC transporters	KEGG PATHWAY	ko02010	6	114	0.406414	1	Cluster-20186.80122|Cluster-12697.1|Cluster-20186.60950|Cluster-20186.25252|Cluster-20186.78587|Cluster-24973.0	http://www.genome.jp/kegg-bin/show_pathway?ko02010/K05674%09red/K05658%09red
Pentose and glucuronate interconversions	KEGG PATHWAY	ko00040	13	270	0.434097	1	Cluster-20186.56381|Cluster-20186.68627|Cluster-20186.74889|Cluster-20186.59245|Cluster-20186.59244|Cluster-20186.98318|Cluster-20186.59022|Cluster-20186.49016|Cluster-20186.54111|Cluster-20186.99937|Cluster-20186.59703|Cluster-20186.44938|Cluster-20186.54287	http://www.genome.jp/kegg-bin/show_pathway?ko00040/K16190%09red/K01805%09red/K00008%09red/K00128%09red/K01783%09red/K00012%09red/K01728%09red
Glycerophospholipid metabolism	KEGG PATHWAY	ko00564	23	491	0.439334	1	Cluster-20186.82242|Cluster-20186.102347|Cluster-20186.79243|Cluster-20186.102346|Cluster-20186.85690|Cluster-20186.37904|Cluster-20186.73260|Cluster-20186.71822|Cluster-20186.38166|Cluster-20186.39275|Cluster-20186.66223|Cluster-20186.51452|Cluster-20186.62928|Cluster-20186.92010|Cluster-20186.32450|Cluster-20186.37051|Cluster-20186.85687|Cluster-20186.57382|Cluster-20186.44370|Cluster-20186.639…	http://www.genome.jp/kegg-bin/show_pathway?ko00564/K00006%09red/K13523%09red/K18696%09red/K00901%09red/K00993%09red/K01115%09red/K15728%09red/K13508%09red/K00111%09red/K01114%09red/K01517%09red/K00630%09red/K01126%09red
Glycosphingolipid biosynthesis - globo series	KEGG PATHWAY	ko00603	2	33	0.44411	1	Cluster-20186.105486|Cluster-20186.57338	http://www.genome.jp/kegg-bin/show_pathway?ko00603/K07407%09red
Glucosinolate biosynthesis	KEGG PATHWAY	ko00966	1	13	0.457282	1	Cluster-20186.51492	http://www.genome.jp/kegg-bin/show_pathway?ko00966/K11821%09red
Ubiquinone and other terpenoid-quinone biosynthesis	KEGG PATHWAY	ko00130	7	146	0.480861	1	Cluster-20186.57522|Cluster-20186.54703|Cluster-20186.60213|Cluster-20186.59874|Cluster-20186.56117|Cluster-20186.24090|Cluster-20186.51853	http://www.genome.jp/kegg-bin/show_pathway?ko00130/K05928%09red/K12502%09red/K02552%09red/K00815%09red/K03809%09red/K01904%09red
Phenylalanine metabolism	KEGG PATHWAY	ko00360	9	191	0.484411	1	Cluster-20186.57522|Cluster-20186.90957|Cluster-20186.60213|Cluster-20186.59874|Cluster-20186.62755|Cluster-20186.70970|Cluster-20186.27280|Cluster-20186.74159|Cluster-20186.36086	http://www.genome.jp/kegg-bin/show_pathway?ko00360/K00276%09red/K10775%09red/K00815%09red/K01904%09red/K07253%09red/K14454%09red
beta-Alanine metabolism	KEGG PATHWAY	ko00410	11	236	0.486979	1	Cluster-20186.59703|Cluster-20186.59245|Cluster-20186.90957|Cluster-20186.90538|Cluster-20186.59244|Cluster-20186.27280|Cluster-20186.43893|Cluster-20186.50927|Cluster-20186.43891|Cluster-20186.57107|Cluster-20186.43894	http://www.genome.jp/kegg-bin/show_pathway?ko00410/K00276%09red/K00128%09red/K00797%09red/K01580%09red/K14085%09red/K01431%09red
Thiamine metabolism	KEGG PATHWAY	ko00730	3	59	0.497166	1	Cluster-20186.55944|Cluster-20186.55787|Cluster-20186.21779	http://www.genome.jp/kegg-bin/show_pathway?ko00730/K14153%09red/K03146%09red/K01662%09red
Stilbenoid, diarylheptanoid and gingerol biosynthesis	KEGG PATHWAY	ko00945	4	82	0.503414	1	Cluster-20394.0|Cluster-20186.47120|Cluster-20186.22238|Cluster-20186.69083	http://www.genome.jp/kegg-bin/show_pathway?ko00945/K13065%09red/K00517%09red
Fatty acid elongation	KEGG PATHWAY	ko00062	6	127	0.50438	1	Cluster-20186.69477|Cluster-20186.53643|Cluster-20186.92338|Cluster-20186.96560|Cluster-20186.97794|Cluster-20186.12449	http://www.genome.jp/kegg-bin/show_pathway?ko00062/K10251%09red/K15397%09red
Other types of O-glycan biosynthesis	KEGG PATHWAY	ko00514	2	41	0.553407	1	Cluster-20186.78699|Cluster-20186.74492	http://www.genome.jp/kegg-bin/show_pathway?ko00514/K09667%09red
Lysine biosynthesis	KEGG PATHWAY	ko00300	2	42	0.565957	1	Cluster-20186.90538|Cluster-20186.64094	http://www.genome.jp/kegg-bin/show_pathway?ko00300/K00928%09red/K14085%09red
Pantothenate and CoA biosynthesis	KEGG PATHWAY	ko00770	5	116	0.593083	1	Cluster-20186.43893|Cluster-20186.72434|Cluster-20186.43891|Cluster-20186.92283|Cluster-20186.43894	http://www.genome.jp/kegg-bin/show_pathway?ko00770/K01431%09red/K00826%09red/K02201%09red
Ether lipid metabolism	KEGG PATHWAY	ko00565	6	141	0.602569	1	Cluster-20186.73260|Cluster-20186.66223|Cluster-20186.38252|Cluster-20186.62928|Cluster-20186.39275|Cluster-20186.17668	http://www.genome.jp/kegg-bin/show_pathway?ko00565/K01114%09red/K00993%09red/K01115%09red
Phenylalanine, tyrosine and tryptophan biosynthesis	KEGG PATHWAY	ko00400	7	168	0.623217	1	Cluster-20186.57522|Cluster-20186.85255|Cluster-20186.51884|Cluster-20186.59874|Cluster-20186.36086|Cluster-20186.26396|Cluster-20186.61947	http://www.genome.jp/kegg-bin/show_pathway?ko00400/K14454%09red/K06001%09red/K01658%09red/K13832%09red/K00815%09red/K01626%09red
Glycosaminoglycan degradation	KEGG PATHWAY	ko00531	3	73	0.635432	1	Cluster-20186.41200|Cluster-20186.67058|Cluster-20186.65572	http://www.genome.jp/kegg-bin/show_pathway?ko00531/K10532%09red/K07964%09red
Brassinosteroid biosynthesis	KEGG PATHWAY	ko00905	2	51	0.667354	1	Cluster-20186.52590|Cluster-20186.52517	http://www.genome.jp/kegg-bin/show_pathway?ko00905/K09588%09red
Valine, leucine and isoleucine degradation	KEGG PATHWAY	ko00280	12	304	0.701348	1	Cluster-20186.44490|Cluster-18598.0|Cluster-20186.59245|Cluster-20186.59244|Cluster-20186.90538|Cluster-20186.92283|Cluster-20186.13181|Cluster-20186.90916|Cluster-20186.20017|Cluster-20186.59703|Cluster-20186.87702|Cluster-20186.60158	http://www.genome.jp/kegg-bin/show_pathway?ko00280/K00166%09red/K00128%09red/K00827%09red/K00826%09red/K14085%09red/K00253%09red/K07513%09red/K09699%09red
Histidine metabolism	KEGG PATHWAY	ko00340	4	111	0.728846	1	Cluster-20186.90538|Cluster-20186.59703|Cluster-20186.59245|Cluster-20186.59244	http://www.genome.jp/kegg-bin/show_pathway?ko00340/K00128%09red/K14085%09red
Monoterpenoid biosynthesis	KEGG PATHWAY	ko00902	1	29	0.730171	1	Cluster-20186.77284	http://www.genome.jp/kegg-bin/show_pathway?ko00902/K15086%09red
C5-Branched dibasic acid metabolism	KEGG PATHWAY	ko00660	1	30	0.741705	1	Cluster-20186.34751	http://www.genome.jp/kegg-bin/show_pathway?ko00660/K01703%09red
Arginine and proline metabolism	KEGG PATHWAY	ko00330	10	266	0.745205	1	Cluster-20186.39481|Cluster-20186.59530|Cluster-20186.59245|Cluster-20186.59244|Cluster-20186.90538|Cluster-20186.50927|Cluster-14901.0|Cluster-20186.49934|Cluster-20186.36086|Cluster-20186.59703	http://www.genome.jp/kegg-bin/show_pathway?ko00330/K14454%09red/K00294%09red/K00128%09red/K01581%09red/K14085%09red/K00797%09red/K12657%09red
Phagosome	KEGG PATHWAY	ko04145	23	586	0.756485	1	Cluster-20186.97443|Cluster-20186.54209|Cluster-20186.58147|Cluster-30508.0|Cluster-20186.37166|Cluster-20186.37167|Cluster-20186.1408|Cluster-20186.60488|Cluster-20186.68207|Cluster-20186.51949|Cluster-20186.75333|Cluster-31888.0|Cluster-20186.7314|Cluster-20186.56950|Cluster-19174.0|Cluster-20186.49861|Cluster-20186.72597|Cluster-20186.6201|Cluster-20186.50578|Cluster-20186.2245|Cluster-20186.5…	http://www.genome.jp/kegg-bin/show_pathway?ko04145/K08054%09red/K08057%09red/K10956%09red/K07374%09red/K07375%09red/K07342%09red/K00921%09red/K02145%09red/K02155%09red/K04392%09red
Sulfur relay system	KEGG PATHWAY	ko04122	1	32	0.763317	1	Cluster-20186.26897	http://www.genome.jp/kegg-bin/show_pathway?ko04122/K03639%09red
Flavonoid biosynthesis	KEGG PATHWAY	ko00941	3	96	0.800176	1	Cluster-20186.3486|Cluster-20186.22238|Cluster-20186.69083	http://www.genome.jp/kegg-bin/show_pathway?ko00941/K13065%09red/K08695%09red
Zeatin biosynthesis	KEGG PATHWAY	ko00908	2	70	0.818464	1	Cluster-20186.42572|Cluster-31845.2	http://www.genome.jp/kegg-bin/show_pathway?ko00908/K00279%09red
Valine, leucine and isoleucine biosynthesis	KEGG PATHWAY	ko00290	2	71	0.824389	1	Cluster-20186.92283|Cluster-20186.34751	http://www.genome.jp/kegg-bin/show_pathway?ko00290/K00826%09red/K01703%09red
Nicotinate and nicotinamide metabolism	KEGG PATHWAY	ko00760	2	72	0.830139	1	Cluster-20186.55292|Cluster-20186.39704	http://www.genome.jp/kegg-bin/show_pathway?ko00760/K00763%09red/K18551%09red
Citrate cycle (TCA cycle)	KEGG PATHWAY	ko00020	13	368	0.831485	1	Cluster-20186.50364|Cluster-20186.54626|Cluster-20186.55137|Cluster-20186.66371|Cluster-20186.50363|Cluster-20186.9266|Cluster-20186.26388|Cluster-20186.55167|Cluster-20186.54074|Cluster-20186.53333|Cluster-9588.0|Cluster-20186.48714|Cluster-20186.58117	http://www.genome.jp/kegg-bin/show_pathway?ko00020/K00162%09red/K01681%09red/K01648%09red/K00234%09red/K01610%09red/K00026%09red/K01647%09red
Taurine and hypotaurine metabolism	KEGG PATHWAY	ko00430	1	43	0.853643	1	Cluster-20186.57107	http://www.genome.jp/kegg-bin/show_pathway?ko00430/K01580%09red
Regulation of autophagy	KEGG PATHWAY	ko04140	6	195	0.863051	1	Cluster-20186.52397|Cluster-20186.66473|Cluster-20186.79818|Cluster-20186.75770|Cluster-20186.55336|Cluster-20186.50917	http://www.genome.jp/kegg-bin/show_pathway?ko04140/K08341%09red/K08269%09red/K07198%09red
Fatty acid biosynthesis	KEGG PATHWAY	ko00061	5	171	0.875306	1	Cluster-20186.69260|Cluster-20186.53720|Cluster-20186.30687|Cluster-20186.60602|Cluster-20186.5083	http://www.genome.jp/kegg-bin/show_pathway?ko00061/K10781%09red/K01897%09red/K03921%09red/K00208%09red
Folate biosynthesis	KEGG PATHWAY	ko00790	1	50	0.892222	1	Cluster-20186.26897	http://www.genome.jp/kegg-bin/show_pathway?ko00790/K03639%09red
Biotin metabolism	KEGG PATHWAY	ko00780	1	51	0.896832	1	Cluster-20186.5083	http://www.genome.jp/kegg-bin/show_pathway?ko00780/K00208%09red
Protein export	KEGG PATHWAY	ko03060	5	188	0.918667	1	Cluster-20186.7314|Cluster-20186.51949|Cluster-20186.57675|Cluster-20186.6201|Cluster-20186.42839	http://www.genome.jp/kegg-bin/show_pathway?ko03060/K03110%09red/K10956%09red/K09490%09red/K07342%09red
Sesquiterpenoid and triterpenoid biosynthesis	KEGG PATHWAY	ko00909	1	57	0.920637	1	Cluster-20186.35261	http://www.genome.jp/kegg-bin/show_pathway?ko00909/K00511%09red
Terpenoid backbone biosynthesis	KEGG PATHWAY	ko00900	5	195	0.932248	1	Cluster-20186.21779|Cluster-20186.58897|Cluster-20186.82457|Cluster-20186.49959|Cluster-20186.59346	http://www.genome.jp/kegg-bin/show_pathway?ko00900/K10960%09red/K01770%09red/K01662%09red/K14066%09red/K11778%09red
Aminoacyl-tRNA biosynthesis	KEGG PATHWAY	ko00970	6	230	0.940439	1	Cluster-20186.24153|Cluster-20186.30749|Cluster-20186.72377|Cluster-20186.28162|Cluster-20186.19226|Cluster-20186.65536	http://www.genome.jp/kegg-bin/show_pathway?ko00970/K01880%09red/K02435%09red/K01876%09red/K01867%09red/K00604%09red
Cell cycle - Caulobacter	KEGG PATHWAY	ko04112	1	68	0.950943	1	Cluster-20186.96304	http://www.genome.jp/kegg-bin/show_pathway?ko04112/K03544%09red
Arachidonic acid metabolism	KEGG PATHWAY	ko00590	1	69	0.953043	1	Cluster-20186.54536	http://www.genome.jp/kegg-bin/show_pathway?ko00590/K00432%09red
Selenocompound metabolism	KEGG PATHWAY	ko00450	2	115	0.962561	1	Cluster-20186.12830|Cluster-20186.95786	http://www.genome.jp/kegg-bin/show_pathway?ko00450/K01761%09red/K13811%09red
Ubiquitin mediated proteolysis	KEGG PATHWAY	ko04120	20	646	0.964056	1	Cluster-20186.42543|Cluster-20186.1134|Cluster-20186.70409|Cluster-20186.42547|Cluster-20186.42544|Cluster-6666.0|Cluster-3349.0|Cluster-20186.63499|Cluster-20186.31268|Cluster-20186.41827|Cluster-20186.100236|Cluster-20186.5481|Cluster-20186.75212|Cluster-20186.56998|Cluster-20186.12570|Cluster-20186.43166|Cluster-20186.89023|Cluster-20186.56165|Cluster-20186.10815|Cluster-20186.56997	http://www.genome.jp/kegg-bin/show_pathway?ko04120/K04506%09red/K10143%09red/K06689%09red/K10592%09red/K10144%09red/K10609%09red/K10571%09red/K10577%09red/K03363%09red/K03364%09red
Purine metabolism	KEGG PATHWAY	ko00230	17	572	0.968564	1	Cluster-20186.58317|Cluster-20186.13936|Cluster-20186.40927|Cluster-20186.71822|Cluster-20186.41350|Cluster-20186.95786|Cluster-5087.0|Cluster-20186.30820|Cluster-20186.84098|Cluster-20186.50366|Cluster-20186.53484|Cluster-20186.27141|Cluster-20186.56621|Cluster-20186.42663|Cluster-20186.92238|Cluster-20186.85904|Cluster-20186.44370	http://www.genome.jp/kegg-bin/show_pathway?ko00230/K00939%09red/K10808%09red/K01517%09red/K01951%09red/K02320%09red/K13811%09red/K00764%09red/K00860%09red/K00873%09red/K01490%09red
Oxidative phosphorylation	KEGG PATHWAY	ko00190	22	714	0.971762	1	Cluster-20186.98706|Cluster-30508.0|Cluster-20186.5236|Cluster-20186.7998|Cluster-20186.1408|Cluster-20186.46130|Cluster-20186.45219|Cluster-9588.0|Cluster-20186.52265|Cluster-11496.1|Cluster-20186.2198|Cluster-20186.56040|Cluster-20186.54172|Cluster-20186.62695|Cluster-20186.46128|Cluster-20186.55671|Cluster-20186.57579|Cluster-20186.96198|Cluster-20186.7287|Cluster-20186.100963|Cluster-20186.39…	http://www.genome.jp/kegg-bin/show_pathway?ko00190/K02113%09red/K02256%09red/K00417%09red/K00412%09red/K02115%09red/K00413%09red/K01507%09red/K02258%09red/K02109%09red/K02128%09red/K00234%09red/K02145%09red/K02261%09red/K02133%09red/K02132%09red/K02155%09red
Plant-pathogen interaction	KEGG PATHWAY	ko04626	25	795	0.972062	1	Cluster-20186.70249|Cluster-20186.10959|Cluster-20186.101267|Cluster-20186.101268|Cluster-20186.47389|Cluster-20186.18540|Cluster-20186.61910|Cluster-20186.21748|Cluster-20186.56122|Cluster-20186.93998|Cluster-20186.53539|Cluster-20186.59325|Cluster-20186.3816|Cluster-20186.7457|Cluster-20186.98716|Cluster-20186.70250|Cluster-20186.80959|Cluster-20186.67074|Cluster-20186.52332|Cluster-20186.75777…	http://www.genome.jp/kegg-bin/show_pathway?ko04626/K13459%09red/K13449%09red/K13412%09red/K04079%09red/K05391%09red/K04368%09red/K18875%09red/K13448%09red/K13447%09red/K13420%09red/K00864%09red/K02183%09red
Other glycan degradation	KEGG PATHWAY	ko00511	2	128	0.976834	1	Cluster-20186.39409|Cluster-20186.17983	http://www.genome.jp/kegg-bin/show_pathway?ko00511/K17108%09red
Butanoate metabolism	KEGG PATHWAY	ko00650	1	94	0.984275	1	Cluster-20186.57107	http://www.genome.jp/kegg-bin/show_pathway?ko00650/K01580%09red
Lysine degradation	KEGG PATHWAY	ko00310	4	213	0.984339	1	Cluster-20186.90538|Cluster-20186.59703|Cluster-20186.59245|Cluster-20186.59244	http://www.genome.jp/kegg-bin/show_pathway?ko00310/K00128%09red/K14085%09red
Cysteine and methionine metabolism	KEGG PATHWAY	ko00270	12	474	0.987399	1	Cluster-20186.57522|Cluster-20186.58812|Cluster-20186.92283|Cluster-20186.64094|Cluster-20186.13181|Cluster-20186.59874|Cluster-20186.50894|Cluster-20186.50927|Cluster-20186.48714|Cluster-20186.54891|Cluster-20186.12830|Cluster-20186.36086	http://www.genome.jp/kegg-bin/show_pathway?ko00270/K05933%09red/K14454%09red/K00928%09red/K00797%09red/K00547%09red/K00827%09red/K00826%09red/K00815%09red/K01761%09red/K13034%09red/K00026%09red
N-Glycan biosynthesis	KEGG PATHWAY	ko00510	4	225	0.989308	1	Cluster-20186.29879|Cluster-6027.0|Cluster-20186.51001|Cluster-20186.87999	http://www.genome.jp/kegg-bin/show_pathway?ko00510/K07151%09red/K00737%09red/K07441%09red
RNA degradation	KEGG PATHWAY	ko03018	13	514	0.990029	1	Cluster-20186.21452|Cluster-20186.53432|Cluster-20186.53015|Cluster-20186.54321|Cluster-20186.1838|Cluster-20186.40326|Cluster-20186.5157|Cluster-18216.0|Cluster-20186.53695|Cluster-26863.0|Cluster-20186.60985|Cluster-9715.0|Cluster-20186.12580	http://www.genome.jp/kegg-bin/show_pathway?ko03018/K00850%09red/K04043%09red/K01689%09red/K12614%09red/K12605%09red/K10643%09red/K04077%09red/K13126%09red
Basal transcription factors	KEGG PATHWAY	ko03022	3	196	0.991838	1	Cluster-20186.51656|Cluster-20186.76827|Cluster-20186.66350	http://www.genome.jp/kegg-bin/show_pathway?ko03022/K03141%09red/K03122%09red/K03139%09red
Propanoate metabolism	KEGG PATHWAY	ko00640	3	199	0.992651	1	Cluster-20186.90916|Cluster-20186.87702|Cluster-20186.20017	http://www.genome.jp/kegg-bin/show_pathway?ko00640/K00166%09red/K09699%09red
Base excision repair	KEGG PATHWAY	ko03410	2	161	0.993362	1	Cluster-2691.0|Cluster-20186.96880	http://www.genome.jp/kegg-bin/show_pathway?ko03410/K10798%09red/K10802%09red
Glycosylphosphatidylinositol(GPI)-anchor biosynthesis	KEGG PATHWAY	ko00563	1	130	0.996751	1	Cluster-20186.9645	http://www.genome.jp/kegg-bin/show_pathway?ko00563/K05310%09red
DNA replication	KEGG PATHWAY	ko03030	2	186	0.997483	1	Cluster-20186.27141|Cluster-20186.14392	http://www.genome.jp/kegg-bin/show_pathway?ko03030/K02320%09red/K10742%09red
Mismatch repair	KEGG PATHWAY	ko03430	1	140	0.997904	1	Cluster-17626.0	http://www.genome.jp/kegg-bin/show_pathway?ko03430/K08739%09red
Protein processing in endoplasmic reticulum	KEGG PATHWAY	ko04141	31	1150	0.999082	1	Cluster-20186.10959|Cluster-20186.97445|Cluster-20186.101267|Cluster-20186.101268|Cluster-16097.0|Cluster-20186.3975|Cluster-20186.3977|Cluster-20186.48077|Cluster-20186.57027|Cluster-6027.0|Cluster-20186.90000|Cluster-20186.44560|Cluster-20186.51949|Cluster-25726.0|Cluster-20186.5425|Cluster-20186.7457|Cluster-4616.0|Cluster-20186.33223|Cluster-20186.52925|Cluster-20186.7314|Cluster-20186.70409|…	http://www.genome.jp/kegg-bin/show_pathway?ko04141/K08054%09red/K13525%09red/K08057%09red/K06689%09red/K09503%09red/K13989%09red/K10956%09red/K10666%09red/K13993%09red/K07342%09red/K07151%09red/K09490%09red/K08852%09red/K04079%09red/K10636%09red/K09580%09red/K03283%09red
Pyrimidine metabolism	KEGG PATHWAY	ko00240	7	414	0.999166	1	Cluster-20186.68229|Cluster-20186.45335|Cluster-20186.41350|Cluster-20186.43893|Cluster-20186.27141|Cluster-20186.43891|Cluster-20186.43894	http://www.genome.jp/kegg-bin/show_pathway?ko00240/K01431%09red/K16904%09red/K09903%09red/K02320%09red/K10808%09red
Nucleotide excision repair	KEGG PATHWAY	ko03420	2	233	0.999609	1	Cluster-20186.76827|Cluster-20186.75212	http://www.genome.jp/kegg-bin/show_pathway?ko03420/K10609%09red/K03141%09red
Homologous recombination	KEGG PATHWAY	ko03440	1	183	0.999682	1	Cluster-20186.32093	http://www.genome.jp/kegg-bin/show_pathway?ko03440/K10875%09red
Ribosome biogenesis in eukaryotes	KEGG PATHWAY	ko03008	3	356	0.999979	1	Cluster-5759.0|Cluster-20186.55246|Cluster-12591.0	http://www.genome.jp/kegg-bin/show_pathway?ko03008/K14563%09red/K14557%09red/K07936%09red
mRNA surveillance pathway	KEGG PATHWAY	ko03015	13	754	0.999982	1	Cluster-20186.91201|Cluster-20186.8759|Cluster-20186.64827|Cluster-20186.53015|Cluster-20186.10031|Cluster-20186.59665|Cluster-20186.28589|Cluster-20186.56391|Cluster-20186.93195|Cluster-20186.75776|Cluster-20186.54321|Cluster-2450.0|Cluster-20186.12580	http://www.genome.jp/kegg-bin/show_pathway?ko03015/K14411%09red/K13171%09red/K14376%09red/K03267%09red/K14328%09red/K06269%09red/K14397%09red/K13126%09red
RNA transport	KEGG PATHWAY	ko03013	15	860	0.999994	1	Cluster-20186.90497|Cluster-20186.93195|Cluster-20186.4771|Cluster-20186.54321|Cluster-20186.43166|Cluster-20186.28589|Cluster-12591.0|Cluster-13991.0|Cluster-7132.0|Cluster-20186.94812|Cluster-20186.103363|Cluster-20186.53015|Cluster-20186.90823|Cluster-2450.0|Cluster-20186.12580	http://www.genome.jp/kegg-bin/show_pathway?ko03013/K03113%09red/K10577%09red/K13171%09red/K12160%09red/K03257%09red/K14328%09red/K07936%09red/K14291%09red/K03231%09red/K03253%09red/K13126%09red
Endocytosis	KEGG PATHWAY	ko04144	17	929	0.999994	1	Cluster-20186.26071|Cluster-20186.55122|Cluster-20186.97445|Cluster-20186.92277|Cluster-20186.39348|Cluster-20186.17258|Cluster-20186.3975|Cluster-20186.50954|Cluster-20186.3977|Cluster-20186.57004|Cluster-20186.105501|Cluster-20186.5425|Cluster-20186.57027|Cluster-20186.49059|Cluster-20186.21138|Cluster-20186.62928|Cluster-20186.57680	http://www.genome.jp/kegg-bin/show_pathway?ko04144/K11824%09red/K12184%09red/K15053%09red/K01115%09red/K19366%09red/K07904%09red/K00889%09red/K03283%09red
Spliceosome	KEGG PATHWAY	ko03040	13	925	1	1	Cluster-20186.97445|Cluster-20186.59881|Cluster-20186.57027|Cluster-20186.68231|Cluster-9082.0|Cluster-20186.57562|Cluster-20186.3977|Cluster-25125.1|Cluster-20186.5425|Cluster-20186.3975|Cluster-20186.67663|Cluster-20186.70414|Cluster-20186.17442	http://www.genome.jp/kegg-bin/show_pathway?ko03040/K12741%09red/K12837%09red/K12823%09red/K12854%09red/K12897%09red/K12890%09red/K03283%09red
Proteasome	KEGG PATHWAY	ko03050	1	373	1	1	Cluster-20186.28936	http://www.genome.jp/kegg-bin/show_pathway?ko03050/K06700%09red
Ribosome	KEGG PATHWAY	ko03010	24	1813	1	1	Cluster-20186.101859|Cluster-20186.49249|Cluster-20186.63498|Cluster-20186.12076|Cluster-31619.0|Cluster-20186.72672|Cluster-20672.0|Cluster-7627.0|Cluster-20186.52057|Cluster-20186.8287|Cluster-28548.0|Cluster-20186.71232|Cluster-20186.5306|Cluster-18200.0|Cluster-4969.2|Cluster-31791.0|Cluster-20186.4921|Cluster-6320.0|Cluster-20186.54023|Cluster-20186.17323|Cluster-20186.60194|Cluster-20186.10…	http://www.genome.jp/kegg-bin/show_pathway?ko03010/K02866%09red/K02931%09red/K02930%09red/K02935%09red/K02934%09red/K02937%09red/K02936%09red/K02868%09red/K02880%09red/K02991%09red/K02975%09red/K02977%09red/K02998%09red/K02888%09red/K02877%09red/K02925%09red/K02900%09red/K02985%09red/K02987%09red/K02981%09red/K02966%09red/K02941%09red/K02945%09red

## Sheet: DvsR.DEG_KEGG_pathway_enrichmen
#Term	Database	ID	Input number	Background number	P-Value	Corrected P-Value	Input	Hyperlink
Plant hormone signal transduction	KEGG PATHWAY	ko04075	158	1204	5.27673e-21	6.06824e-19	Cluster-20186.46068|Cluster-20186.54204|Cluster-20186.54205|Cluster-20186.94384|Cluster-20186.94383|Cluster-20186.94381|Cluster-20186.105075|Cluster-20186.78153|Cluster-20186.86597|Cluster-20186.61605|Cluster-20186.51729|Cluster-20186.53557|Cluster-20186.96764|Cluster-20186.66711|Cluster-20186.104241|Cluster-20186.8064|Cluster-20186.73134|Cluster-20186.14303|Cluster-20186.94617|Cluster-20186.5389…	http://www.genome.jp/kegg-bin/show_pathway?ko04075/K14486%09red/K14487%09red/K14484%09red/K14485%09red/K14488%09red/K14489%09red/K13946%09red/K14432%09red/K14431%09red/K14514%09red/K14516%09red/K14494%09red/K14497%09red/K14496%09red/K14491%09red/K14490%09red/K14493%09red/K14492%09red/K16189%09red/K14499%09red/K14498%09red/K14505%09red/K14500%09red/K14509%09red/K14508%09red/K12126%09red
Photosynthesis	KEGG PATHWAY	ko00195	55	231	5.51179e-17	3.16928e-15	Cluster-20186.55259|Cluster-20186.55014|Cluster-20186.57485|Cluster-20186.59025|Cluster-20186.56599|Cluster-20186.55151|Cluster-20186.55559|Cluster-20186.63212|Cluster-20186.56966|Cluster-20186.55313|Cluster-20186.43097|Cluster-20186.54573|Cluster-20186.28300|Cluster-20186.56380|Cluster-20186.54424|Cluster-20186.55321|Cluster-20186.54423|Cluster-20186.58716|Cluster-20186.55369|Cluster-20186.55425…	http://www.genome.jp/kegg-bin/show_pathway?ko00195/K02694%09red/K02695%09red/K02115%09red/K02693%09red/K02698%09red/K02699%09red/K02113%09red/K02692%09red/K02701%09red/K02641%09red/K02704%09red/K02721%09red/K02723%09red/K03541%09red/K02109%09red/K08905%09red/K08902%09red/K14332%09red/K08901%09red/K02636%09red/K03542%09red/K02717%09red/K02716%09red/K02638%09red/K02639%09red
Photosynthesis - antenna proteins	KEGG PATHWAY	ko00196	23	81	3.79589e-09	1.45509e-07	Cluster-20186.55270|Cluster-20186.56903|Cluster-20186.55396|Cluster-20186.55395|Cluster-20186.55173|Cluster-20186.55623|Cluster-20186.55075|Cluster-20186.55212|Cluster-20186.55541|Cluster-20186.55421|Cluster-20186.55791|Cluster-20186.70621|Cluster-20186.55350|Cluster-20186.55225|Cluster-20186.55630|Cluster-20186.55147|Cluster-20186.55449|Cluster-20186.54650|Cluster-20186.55306|Cluster-20186.55355…	http://www.genome.jp/kegg-bin/show_pathway?ko00196/K08907%09red/K08908%09red/K08909%09red/K08915%09red/K08914%09red/K08917%09red/K08916%09red/K08911%09red/K08910%09red/K08913%09red/K08912%09red
Carbon fixation in photosynthetic organisms	KEGG PATHWAY	ko00710	57	466	1.92709e-07	5.54038e-06	Cluster-20186.51267|Cluster-20186.33309|Cluster-20186.55137|Cluster-20186.63133|Cluster-20186.55121|Cluster-20186.55279|Cluster-20186.54263|Cluster-20186.54474|Cluster-20186.53238|Cluster-20186.33366|Cluster-20186.25748|Cluster-20186.31304|Cluster-20186.57064|Cluster-20186.55330|Cluster-20186.55332|Cluster-20186.25747|Cluster-20186.52717|Cluster-20186.55653|Cluster-20186.55324|Cluster-20186.53440…	http://www.genome.jp/kegg-bin/show_pathway?ko00710/K00855%09red/K00134%09red/K14272%09red/K14454%09red/K01100%09red/K00814%09red/K01803%09red/K01783%09red/K01807%09red/K03841%09red/K01595%09red/K01623%09red/K05298%09red/K00927%09red/K00615%09red/K01602%09red/K00026%09red/K00029%09red/K01610%09red/K00028%09red
Porphyrin and chlorophyll metabolism	KEGG PATHWAY	ko00860	28	155	3.86025e-07	8.87858e-06	Cluster-20186.84570|Cluster-20186.53964|Cluster-20186.58897|Cluster-20186.58591|Cluster-20186.52525|Cluster-20186.67008|Cluster-20186.56968|Cluster-20186.52543|Cluster-20186.59403|Cluster-20186.60049|Cluster-20186.54279|Cluster-20186.57351|Cluster-20186.56360|Cluster-20186.56277|Cluster-20186.59700|Cluster-20186.52832|Cluster-20186.46237|Cluster-20186.54235|Cluster-20186.55067|Cluster-20186.55069…	http://www.genome.jp/kegg-bin/show_pathway?ko00860/K02492%09red/K04040%09red/K13600%09red/K08099%09red/K04035%09red/K01749%09red/K13606%09red/K18010%09red/K19073%09red/K03403%09red/K13071%09red/K03428%09red/K03404%09red/K03405%09red/K01845%09red/K10960%09red/K00218%09red/K01599%09red
Carotenoid biosynthesis	KEGG PATHWAY	ko00906	25	129	5.13923e-07	9.8502e-06	Cluster-20186.6931|Cluster-27299.0|Cluster-20186.14559|Cluster-20186.82917|Cluster-20186.82916|Cluster-20186.66081|Cluster-20186.51802|Cluster-20186.55504|Cluster-20186.60103|Cluster-20186.98181|Cluster-20186.54338|Cluster-20186.51273|Cluster-20186.66078|Cluster-20186.60069|Cluster-20186.91996|Cluster-20186.11445|Cluster-20186.12729|Cluster-20186.11130|Cluster-20186.46145|Cluster-20186.56336|Clus…	http://www.genome.jp/kegg-bin/show_pathway?ko00906/K15746%09red/K15747%09red/K09843%09red/K17911%09red/K09838%09red/K09837%09red/K09840%09red/K09839%09red/K06444%09red
Nitrogen metabolism	KEGG PATHWAY	ko00910	26	144	9.992e-07	1.64154e-05	Cluster-20186.1448|Cluster-20186.57008|Cluster-20186.55707|Cluster-20186.55551|Cluster-20186.55608|Cluster-20186.60709|Cluster-20186.21482|Cluster-20186.55366|Cluster-20186.26940|Cluster-20186.45606|Cluster-20186.58670|Cluster-20186.62603|Cluster-20186.53973|Cluster-20186.54178|Cluster-20186.55568|Cluster-20186.75946|Cluster-20186.69095|Cluster-20186.83806|Cluster-20186.26936|Cluster-20186.53544|…	http://www.genome.jp/kegg-bin/show_pathway?ko00910/K01673%09red/K01674%09red/K00284%09red/K02575%09red/K10534%09red/K01915%09red
Glyoxylate and dicarboxylate metabolism	KEGG PATHWAY	ko00630	45	404	3.02338e-05	0.000434611	Cluster-20186.84705|Cluster-20186.20980|Cluster-20186.56632|Cluster-20186.54782|Cluster-20186.37169|Cluster-20186.55707|Cluster-20186.57008|Cluster-20186.55332|Cluster-20186.75535|Cluster-20186.54715|Cluster-20186.50271|Cluster-20186.43627|Cluster-20186.75533|Cluster-20186.55366|Cluster-20186.70509|Cluster-20186.55409|Cluster-20186.58670|Cluster-20186.72420|Cluster-20186.56006|Cluster-20186.58657…	http://www.genome.jp/kegg-bin/show_pathway?ko00630/K03781%09red/K15893%09red/K00605%09red/K00830%09red/K15918%09red/K11517%09red/K18121%09red/K14272%09red/K01638%09red/K00281%09red/K01681%09red/K00600%09red/K02437%09red/K01602%09red/K00382%09red/K01915%09red/K19269%09red/K00284%09red/K01433%09red/K00026%09red
Starch and sucrose metabolism	KEGG PATHWAY	ko00500	66	735	0.000237048	0.00302895	Cluster-20186.55258|Cluster-20186.74456|Cluster-20186.56772|Cluster-20186.12870|Cluster-20186.70716|Cluster-20186.51187|Cluster-20186.51185|Cluster-8100.0|Cluster-20186.54668|Cluster-20186.51482|Cluster-20186.36518|Cluster-20186.51487|Cluster-20186.69839|Cluster-20186.73500|Cluster-20186.41396|Cluster-20186.61279|Cluster-20186.53005|Cluster-20186.67848|Cluster-20186.77287|Cluster-20186.80460|Clus…	http://www.genome.jp/kegg-bin/show_pathway?ko00500/K01193%09red/K15920%09red/K00975%09red/K00844%09red/K00700%09red/K01188%09red/K16055%09red/K01177%09red/K00770%09red/K08678%09red/K05350%09red/K13648%09red/K08679%09red/K00688%09red/K01087%09red/K00696%09red/K00695%09red
Galactose metabolism	KEGG PATHWAY	ko00052	28	251	0.000869583	0.0100002	Cluster-20186.21452|Cluster-20186.32111|Cluster-20186.96806|Cluster-20186.5626|Cluster-9715.0|Cluster-20186.73616|Cluster-20186.59460|Cluster-20186.24554|Cluster-20186.69175|Cluster-20186.12421|Cluster-20186.12422|Cluster-20186.12423|Cluster-20186.44816|Cluster-20186.20399|Cluster-20186.12811|Cluster-20186.51225|Cluster-20186.63006|Cluster-20186.51065|Cluster-20186.44818|Cluster-20186.46186|Clust…	http://www.genome.jp/kegg-bin/show_pathway?ko00052/K01193%09red/K00850%09red/K00844%09red/K18819%09red/K01784%09red/K06611%09red/K07407%09red/K06617%09red
Ascorbate and aldarate metabolism	KEGG PATHWAY	ko00053	20	186	0.00638007	0.0667008	Cluster-20186.59124|Cluster-20186.57459|Cluster-20186.59245|Cluster-20186.56191|Cluster-20186.54606|Cluster-20186.59104|Cluster-20186.60277|Cluster-20186.59506|Cluster-20186.59889|Cluster-20186.75929|Cluster-20186.50862|Cluster-20186.54468|Cluster-20186.36472|Cluster-20186.55781|Cluster-20186.66227|Cluster-20186.34099|Cluster-20186.59861|Cluster-20186.90538|Cluster-20186.55294|Cluster-20186.56030	http://www.genome.jp/kegg-bin/show_pathway?ko00053/K14190%09red/K08232%09red/K00128%09red/K14085%09red/K00225%09red/K10046%09red/K10047%09red/K00434%09red
Phenylpropanoid biosynthesis	KEGG PATHWAY	ko00940	35	394	0.00725747	0.0677485	Cluster-20186.59866|Cluster-20186.12870|Cluster-20186.57927|Cluster-20186.60299|Cluster-20186.94281|Cluster-20186.28443|Cluster-20186.28447|Cluster-20186.80460|Cluster-20186.69083|Cluster-20186.60213|Cluster-20186.34628|Cluster-20186.104229|Cluster-20186.22617|Cluster-20186.38638|Cluster-20186.51615|Cluster-20186.14200|Cluster-20186.67438|Cluster-20186.44966|Cluster-20186.60498|Cluster-20186.4962…	http://www.genome.jp/kegg-bin/show_pathway?ko00940/K13065%09red/K10775%09red/K13066%09red/K01188%09red/K00083%09red/K05350%09red/K01904%09red/K09755%09red/K00430%09red/K09753%09red
Glycine, serine and threonine metabolism	KEGG PATHWAY	ko00260	32	353	0.00765853	0.0677485	Cluster-20186.20980|Cluster-20186.56632|Cluster-20186.54782|Cluster-20186.37169|Cluster-20186.54715|Cluster-20186.50271|Cluster-20186.43627|Cluster-20186.90538|Cluster-20186.54193|Cluster-20186.72420|Cluster-20186.56006|Cluster-20186.58657|Cluster-20186.46778|Cluster-20186.21741|Cluster-20186.55870|Cluster-20186.55129|Cluster-20186.58582|Cluster-20186.64094|Cluster-5397.0|Cluster-20186.61947|Clus…	http://www.genome.jp/kegg-bin/show_pathway?ko00260/K15893%09red/K00276%09red/K00133%09red/K00830%09red/K15918%09red/K14272%09red/K01696%09red/K00281%09red/K06001%09red/K01620%09red/K00600%09red/K00827%09red/K02437%09red/K00605%09red/K00382%09red/K14085%09red/K00928%09red/K00058%09red
Fructose and mannose metabolism	KEGG PATHWAY	ko00051	30	345	0.0156623	0.127282	Cluster-20186.51267|Cluster-20186.21452|Cluster-20186.71361|Cluster-20186.71362|Cluster-20186.53238|Cluster-20186.31304|Cluster-20186.55330|Cluster-20186.55818|Cluster-20186.59460|Cluster-20186.55188|Cluster-20186.55911|Cluster-20186.59080|Cluster-9715.0|Cluster-20186.52340|Cluster-20186.52343|Cluster-20186.55857|Cluster-20186.49739|Cluster-20186.51225|Cluster-20186.55262|Cluster-20186.48673|Clus…	http://www.genome.jp/kegg-bin/show_pathway?ko00051/K00966%09red/K03841%09red/K00850%09red/K00844%09red/K01803%09red/K00008%09red/K01623%09red/K19355%09red/K17497%09red
ABC transporters	KEGG PATHWAY	ko02010	13	114	0.016602	0.127282	Cluster-20186.3282|Cluster-20186.56554|Cluster-20186.46687|Cluster-20186.80122|Cluster-20186.68853|Cluster-20186.61098|Cluster-20186.78589|Cluster-20186.61035|Cluster-20186.60950|Cluster-20186.25252|Cluster-20186.82304|Cluster-20186.78587|Cluster-28066.0	http://www.genome.jp/kegg-bin/show_pathway?ko02010/K05658%09red/K05643%09red
Cyanoamino acid metabolism	KEGG PATHWAY	ko00460	14	135	0.0259452	0.186481	Cluster-20186.64450|Cluster-20186.28443|Cluster-20186.51615|Cluster-20186.55829|Cluster-20186.45618|Cluster-20186.34628|Cluster-20186.80460|Cluster-20186.12870|Cluster-20186.50894|Cluster-16556.0|Cluster-20186.28447|Cluster-20186.70768|Cluster-20186.55870|Cluster-20186.67438	http://www.genome.jp/kegg-bin/show_pathway?ko00460/K01188%09red/K13034%09red/K13035%09red/K05350%09red/K00600%09red
Pentose phosphate pathway	KEGG PATHWAY	ko00030	28	334	0.0279939	0.18937	Cluster-20186.51267|Cluster-20186.21452|Cluster-20186.55074|Cluster-20186.31304|Cluster-20186.55330|Cluster-20186.56381|Cluster-20186.52717|Cluster-20186.57341|Cluster-20186.55324|Cluster-20186.23009|Cluster-20186.59080|Cluster-9715.0|Cluster-20186.52340|Cluster-20186.52343|Cluster-20186.55857|Cluster-20186.52175|Cluster-20186.56164|Cluster-20186.51225|Cluster-20186.55818|Cluster-20186.56486|Clus…	http://www.genome.jp/kegg-bin/show_pathway?ko00030/K03841%09red/K00850%09red/K00131%09red/K01807%09red/K01623%09red/K00616%09red/K00615%09red/K00036%09red/K01783%09red
Glycolysis / Gluconeogenesis	KEGG PATHWAY	ko00010	52	703	0.0301611	0.192696	Cluster-20186.51267|Cluster-20186.21452|Cluster-20186.58317|Cluster-20186.55137|Cluster-20186.66371|Cluster-20186.59104|Cluster-20186.52343|Cluster-20186.55925|Cluster-20186.53238|Cluster-20186.33366|Cluster-20186.31304|Cluster-20186.35482|Cluster-20186.22492|Cluster-9715.0|Cluster-20186.22490|Cluster-20186.63133|Cluster-20186.55818|Cluster-20186.55188|Cluster-20186.61259|Cluster-20186.52340|Clus…	http://www.genome.jp/kegg-bin/show_pathway?ko00010/K03841%09red/K00850%09red/K00131%09red/K00844%09red/K00134%09red/K01792%09red/K01803%09red/K00162%09red/K00128%09red/K18857%09red/K01623%09red/K01610%09red/K00382%09red/K00873%09red/K00121%09red/K00927%09red/K14085%09red/K03103%09red
Diterpenoid biosynthesis	KEGG PATHWAY	ko00904	10	89	0.0357478	0.216368	Cluster-20186.74491|Cluster-20186.100806|Cluster-28708.0|Cluster-20186.2329|Cluster-20186.81004|Cluster-20186.96393|Cluster-20186.12220|Cluster-20186.86714|Cluster-20186.8523|Cluster-20186.4626	http://www.genome.jp/kegg-bin/show_pathway?ko00904/K04125%09red/K04121%09red/K04123%09red
Steroid biosynthesis	KEGG PATHWAY	ko00100	11	105	0.0424178	0.243902	Cluster-20186.38998|Cluster-20186.55423|Cluster-20186.47388|Cluster-20186.35261|Cluster-20186.46625|Cluster-20186.22730|Cluster-20186.30555|Cluster-20186.51951|Cluster-20186.31537|Cluster-20186.53700|Cluster-20186.79400	http://www.genome.jp/kegg-bin/show_pathway?ko00100/K05917%09red/K00227%09red/K08242%09red/K00511%09red/K14423%09red/K00559%09red/K09828%09red
Monobactam biosynthesis	KEGG PATHWAY	ko00261	4	28	0.0855802	0.468653	Cluster-20186.21741|Cluster-20186.64094|Cluster-20186.95786|Cluster-20186.37974	http://www.genome.jp/kegg-bin/show_pathway?ko00261/K00928%09red/K13811%09red/K00133%09red
Other types of O-glycan biosynthesis	KEGG PATHWAY	ko00514	5	41	0.0931049	0.486685	Cluster-20186.63331|Cluster-20186.78699|Cluster-20186.74492|Cluster-20186.65653|Cluster-20186.69230	http://www.genome.jp/kegg-bin/show_pathway?ko00514/K09667%09red
Alanine, aspartate and glutamate metabolism	KEGG PATHWAY	ko00250	20	261	0.10697	0.534848	Cluster-20186.33309|Cluster-20186.50271|Cluster-20186.59530|Cluster-20186.75946|Cluster-20186.55366|Cluster-20186.55865|Cluster-20186.53954|Cluster-20186.13180|Cluster-20186.54782|Cluster-20186.77134|Cluster-20186.54889|Cluster-20186.53670|Cluster-20186.55707|Cluster-20186.83806|Cluster-20186.58657|Cluster-20186.13181|Cluster-20186.36086|Cluster-20186.57107|Cluster-20186.40687|Cluster-20186.57008	http://www.genome.jp/kegg-bin/show_pathway?ko00250/K14454%09red/K00294%09red/K01953%09red/K00827%09red/K14272%09red/K00814%09red/K01580%09red/K00830%09red/K01915%09red
Vitamin B6 metabolism	KEGG PATHWAY	ko00750	5	45	0.121783	0.583545	Cluster-20186.47067|Cluster-20186.23380|Cluster-20186.55635|Cluster-20186.57111|Cluster-20186.53806	http://www.genome.jp/kegg-bin/show_pathway?ko00750/K06215%09red/K05275%09red/K13248%09red
Glycerolipid metabolism	KEGG PATHWAY	ko00561	22	303	0.137992	0.634764	Cluster-20186.59104|Cluster-20186.79243|Cluster-20186.32451|Cluster-20186.69599|Cluster-20186.43627|Cluster-20186.38166|Cluster-20186.90538|Cluster-20186.58530|Cluster-20186.75929|Cluster-20186.61895|Cluster-20186.3634|Cluster-20186.32450|Cluster-20186.59245|Cluster-20186.3633|Cluster-20186.57382|Cluster-20186.50967|Cluster-20186.46065|Cluster-20186.3312|Cluster-20186.88478|Cluster-20186.57338|Cl…	http://www.genome.jp/kegg-bin/show_pathway?ko00561/K15918%09red/K15728%09red/K09480%09red/K13523%09red/K14085%09red/K03715%09red/K00128%09red/K13508%09red/K00901%09red/K07407%09red/K00630%09red/K06119%09red/K06118%09red
Arginine biosynthesis	KEGG PATHWAY	ko00220	13	165	0.146747	0.641408	Cluster-20186.73906|Cluster-20186.33309|Cluster-20186.83806|Cluster-20186.55707|Cluster-20186.55366|Cluster-20186.63483|Cluster-20186.77134|Cluster-20186.53670|Cluster-20186.75946|Cluster-20186.36086|Cluster-20186.53954|Cluster-20186.55865|Cluster-20186.57008	http://www.genome.jp/kegg-bin/show_pathway?ko00220/K14454%09red/K14272%09red/K00814%09red/K14682%09red/K01915%09red/K00930%09red
Pyruvate metabolism	KEGG PATHWAY	ko00620	33	485	0.150591	0.641408	Cluster-20186.75929|Cluster-20186.28812|Cluster-20186.58317|Cluster-20186.55137|Cluster-20186.66371|Cluster-20186.84705|Cluster-20186.59104|Cluster-20186.53256|Cluster-20186.35482|Cluster-20186.63133|Cluster-20186.25747|Cluster-20186.57064|Cluster-20186.61259|Cluster-20186.57201|Cluster-20186.51044|Cluster-20186.90538|Cluster-20186.54074|Cluster-20186.25748|Cluster-20186.84098|Cluster-20186.74409…	http://www.genome.jp/kegg-bin/show_pathway?ko00620/K14085%09red/K01759%09red/K00162%09red/K00128%09red/K01595%09red/K00029%09red/K00028%09red/K00382%09red/K01638%09red/K00873%09red/K00026%09red/K01610%09red
Phenylalanine, tyrosine and tryptophan biosynthesis	KEGG PATHWAY	ko00400	13	168	0.160029	0.657263	Cluster-20186.85255|Cluster-20186.34740|Cluster-23506.0|Cluster-20186.24232|Cluster-20186.51884|Cluster-20186.54193|Cluster-20186.40367|Cluster-20186.61947|Cluster-20186.36086|Cluster-25873.4|Cluster-20186.86247|Cluster-20186.37320|Cluster-20186.10739	http://www.genome.jp/kegg-bin/show_pathway?ko00400/K14454%09red/K00891%09red/K01696%09red/K06001%09red/K01658%09red/K00815%09red/K01626%09red/K01850%09red/K05359%09red
Amino sugar and nucleotide sugar metabolism	KEGG PATHWAY	ko00520	36	543	0.172716	0.673861	Cluster-20186.31509|Cluster-20186.55258|Cluster-20186.67848|Cluster-20186.70716|Cluster-20186.102184|Cluster-20186.97843|Cluster-20186.54668|Cluster-20186.44224|Cluster-20186.59889|Cluster-20186.69839|Cluster-20186.73500|Cluster-20186.74486|Cluster-20186.60010|Cluster-20186.77287|Cluster-20186.12713|Cluster-20186.55911|Cluster-20186.24554|Cluster-20186.30833|Cluster-20186.59460|Cluster-20186.4946…	http://www.genome.jp/kegg-bin/show_pathway?ko00520/K00966%09red/K00326%09red/K15920%09red/K00975%09red/K00844%09red/K08678%09red/K08679%09red/K01836%09red/K01183%09red/K01784%09red/K00770%09red/K13648%09red/K12446%09red/K12448%09red/K06118%09red/K10046%09red/K17497%09red
Isoquinoline alkaloid biosynthesis	KEGG PATHWAY	ko00950	8	95	0.17579	0.673861	Cluster-23506.0|Cluster-20186.60996|Cluster-20186.33195|Cluster-20186.47793|Cluster-20186.27280|Cluster-20186.36086|Cluster-4826.0|Cluster-20186.95826	http://www.genome.jp/kegg-bin/show_pathway?ko00950/K00276%09red/K00422%09red/K01592%09red/K00815%09red/K14454%09red
Fatty acid elongation	KEGG PATHWAY	ko00062	10	127	0.186342	0.678918	Cluster-20186.96996|Cluster-20186.44165|Cluster-20186.69477|Cluster-20186.53643|Cluster-20186.92338|Cluster-20186.50152|Cluster-20186.49758|Cluster-20186.57143|Cluster-20186.97794|Cluster-20186.12449	http://www.genome.jp/kegg-bin/show_pathway?ko00062/K10703%09red/K10251%09red/K15397%09red/K10258%09red
Tropane, piperidine and pyridine alkaloid biosynthesis	KEGG PATHWAY	ko00960	8	97	0.188916	0.678918	Cluster-20186.37114|Cluster-20186.76190|Cluster-20186.76191|Cluster-23506.0|Cluster-20186.27280|Cluster-20186.42312|Cluster-20186.36086|Cluster-20186.60996	http://www.genome.jp/kegg-bin/show_pathway?ko00960/K00276%09red/K00815%09red/K08081%09red/K14454%09red
Inositol phosphate metabolism	KEGG PATHWAY	ko00562	24	360	0.221365	0.746859	Cluster-20186.53238|Cluster-20186.34099|Cluster-20186.22492|Cluster-20186.22490|Cluster-20186.50321|Cluster-20186.55188|Cluster-20186.14507|Cluster-20186.78824|Cluster-20186.70942|Cluster-20186.68207|Cluster-20186.72688|Cluster-20186.55262|Cluster-20186.55122|Cluster-20186.56950|Cluster-20186.78035|Cluster-20186.55448|Cluster-20186.33823|Cluster-20186.50954|Cluster-20186.39249|Cluster-20186.66764…	http://www.genome.jp/kegg-bin/show_pathway?ko00562/K00140%09red/K00914%09red/K01803%09red/K01114%09red/K05857%09red/K00921%09red/K01858%09red/K01099%09red/K00913%09red/K03103%09red/K10047%09red/K00889%09red
Cutin, suberine and wax biosynthesis	KEGG PATHWAY	ko00073	7	87	0.226232	0.746859	Cluster-20186.52392|Cluster-20186.7298|Cluster-20186.65016|Cluster-20186.50456|Cluster-20186.7918|Cluster-20186.10356|Cluster-20186.54018	http://www.genome.jp/kegg-bin/show_pathway?ko00073/K17991%09red/K15404%09red/K15400%09red/K15402%09red
Sesquiterpenoid and triterpenoid biosynthesis	KEGG PATHWAY	ko00909	5	57	0.227305	0.746859	Cluster-20186.35261|Cluster-20186.95591|Cluster-20186.30555|Cluster-20186.53700|Cluster-20186.74953	http://www.genome.jp/kegg-bin/show_pathway?ko00909/K00511%09red/K15813%09red/K15803%09red
Glycerophospholipid metabolism	KEGG PATHWAY	ko00564	31	491	0.270136	0.859218	Cluster-20186.79243|Cluster-20186.50967|Cluster-20186.102347|Cluster-20186.43037|Cluster-20186.71824|Cluster-20186.71823|Cluster-20186.37904|Cluster-20186.63906|Cluster-20186.38166|Cluster-20186.79635|Cluster-20186.73260|Cluster-20186.51452|Cluster-20186.26833|Cluster-20186.84887|Cluster-20186.32451|Cluster-20186.32450|Cluster-20186.74948|Cluster-21409.0|Cluster-20186.85687|Cluster-20186.57382|Cl…	http://www.genome.jp/kegg-bin/show_pathway?ko00564/K00006%09red/K18696%09red/K05929%09red/K13523%09red/K01517%09red/K01047%09red/K06130%09red/K00993%09red/K15728%09red/K08730%09red/K13508%09red/K00111%09red/K01114%09red/K14156%09red/K00901%09red/K00630%09red/K01126%09red
Tyrosine metabolism	KEGG PATHWAY	ko00350	13	191	0.279544	0.859218	Cluster-20186.44347|Cluster-20186.95826|Cluster-20186.35790|Cluster-23506.0|Cluster-20186.60996|Cluster-20186.33195|Cluster-20186.47793|Cluster-20186.27280|Cluster-20186.74159|Cluster-20186.36086|Cluster-20186.76069|Cluster-20186.54903|Cluster-4826.0	http://www.genome.jp/kegg-bin/show_pathway?ko00350/K00276%09red/K14454%09red/K18857%09red/K00451%09red/K01592%09red/K00815%09red/K07253%09red/K00121%09red/K00422%09red
Sulfur metabolism	KEGG PATHWAY	ko00920	9	127	0.289039	0.859218	Cluster-20186.56382|Cluster-20186.61046|Cluster-20186.95786|Cluster-20186.37974|Cluster-20186.50894|Cluster-20186.74285|Cluster-20186.3851|Cluster-20186.37337|Cluster-20186.58098	http://www.genome.jp/kegg-bin/show_pathway?ko00920/K05907%09red/K13811%09red/K08738%09red/K00640%09red/K00392%09red/K13034%09red
Glutathione metabolism	KEGG PATHWAY	ko00480	21	327	0.291387	0.859218	Cluster-20186.59124|Cluster-20186.23009|Cluster-20186.51871|Cluster-20186.59861|Cluster-20186.54468|Cluster-20186.56486|Cluster-20186.105384|Cluster-20186.60277|Cluster-20186.55514|Cluster-20186.57219|Cluster-20186.51793|Cluster-20186.84557|Cluster-20186.41350|Cluster-20186.50927|Cluster-20186.62681|Cluster-20186.52175|Cluster-20186.50862|Cluster-20186.53923|Cluster-20186.50929|Cluster-20186.4555…	http://www.genome.jp/kegg-bin/show_pathway?ko00480/K10808%09red/K01255%09red/K00432%09red/K00797%09red/K00799%09red/K00036%09red/K10807%09red/K00434%09red
Limonene and pinene degradation	KEGG PATHWAY	ko00903	6	83	0.327765	0.942326	Cluster-20394.0|Cluster-20186.59245|Cluster-20186.32751|Cluster-20186.59104|Cluster-20186.75929|Cluster-20186.47120	http://www.genome.jp/kegg-bin/show_pathway?ko00903/K00128%09red/K00517%09red
Tryptophan metabolism	KEGG PATHWAY	ko00380	11	170	0.35695	1	Cluster-20186.75535|Cluster-20186.59245|Cluster-20186.73464|Cluster-20186.75533|Cluster-20186.90538|Cluster-20186.59104|Cluster-20186.75929|Cluster-20186.56183|Cluster-20186.51492|Cluster-20186.45628|Cluster-20186.43929	http://www.genome.jp/kegg-bin/show_pathway?ko00380/K03781%09red/K11816%09red/K16903%09red/K00128%09red/K14085%09red/K11821%09red
Linoleic acid metabolism	KEGG PATHWAY	ko00591	5	71	0.371666	1	Cluster-20186.55472|Cluster-21409.0|Cluster-20186.54565|Cluster-20186.79163|Cluster-20186.87856	http://www.genome.jp/kegg-bin/show_pathway?ko00591/K01047%09red/K00454%09red/K15718%09red
alpha-Linolenic acid metabolism	KEGG PATHWAY	ko00592	12	194	0.402196	1	Cluster-20186.55472|Cluster-20186.62711|Cluster-20186.60158|Cluster-20186.60181|Cluster-20186.36849|Cluster-20186.95970|Cluster-21409.0|Cluster-20186.50751|Cluster-20186.3697|Cluster-20186.54565|Cluster-20186.20512|Cluster-20186.54903	http://www.genome.jp/kegg-bin/show_pathway?ko00592/K05894%09red/K18857%09red/K00232%09red/K01047%09red/K00454%09red/K01723%09red/K10526%09red/K07513%09red
Riboflavin metabolism	KEGG PATHWAY	ko00740	2	25	0.419708	1	Cluster-20186.68387|Cluster-20186.46643	http://www.genome.jp/kegg-bin/show_pathway?ko00740/K14652%09red
Lysine biosynthesis	KEGG PATHWAY	ko00300	3	42	0.42512	1	Cluster-20186.90538|Cluster-20186.21741|Cluster-20186.64094	http://www.genome.jp/kegg-bin/show_pathway?ko00300/K00928%09red/K00133%09red/K14085%09red
Thiamine metabolism	KEGG PATHWAY	ko00730	4	59	0.425591	1	Cluster-20186.55944|Cluster-20186.21779|Cluster-20186.56143|Cluster-20186.56142	http://www.genome.jp/kegg-bin/show_pathway?ko00730/K03146%09red/K01662%09red
Ubiquinone and other terpenoid-quinone biosynthesis	KEGG PATHWAY	ko00130	9	146	0.430906	1	Cluster-20186.51853|Cluster-20186.54703|Cluster-23506.0|Cluster-20186.60213|Cluster-20186.44968|Cluster-20186.44473|Cluster-20186.24090|Cluster-20186.65114|Cluster-20186.56117	http://www.genome.jp/kegg-bin/show_pathway?ko00130/K05928%09red/K12502%09red/K02552%09red/K00815%09red/K03809%09red/K02548%09red/K01904%09red
beta-Alanine metabolism	KEGG PATHWAY	ko00410	14	236	0.445846	1	Cluster-20186.59245|Cluster-20186.90538|Cluster-20186.59104|Cluster-20186.60996|Cluster-20186.75929|Cluster-20186.54889|Cluster-20186.27280|Cluster-20186.43893|Cluster-20186.50927|Cluster-20186.50929|Cluster-20186.57107|Cluster-20186.43891|Cluster-20186.33823|Cluster-20186.43894	http://www.genome.jp/kegg-bin/show_pathway?ko00410/K00276%09red/K00140%09red/K00128%09red/K00797%09red/K01580%09red/K14085%09red/K01431%09red
Glucosinolate biosynthesis	KEGG PATHWAY	ko00966	1	13	0.531228	1	Cluster-20186.51492	http://www.genome.jp/kegg-bin/show_pathway?ko00966/K11821%09red
Biosynthesis of unsaturated fatty acids	KEGG PATHWAY	ko01040	9	161	0.541968	1	Cluster-20186.96996|Cluster-20186.60158|Cluster-20186.69477|Cluster-20186.52458|Cluster-20186.50152|Cluster-20186.53720|Cluster-20186.102069|Cluster-20186.20512|Cluster-20186.44363	http://www.genome.jp/kegg-bin/show_pathway?ko01040/K10703%09red/K00232%09red/K10258%09red/K10256%09red/K07513%09red/K03921%09red/K00507%09red/K10251%09red
One carbon pool by folate	KEGG PATHWAY	ko00670	6	107	0.550941	1	Cluster-20186.15902|Cluster-20186.70509|Cluster-20186.55829|Cluster-20186.24153|Cluster-20186.37169|Cluster-20186.55870	http://www.genome.jp/kegg-bin/show_pathway?ko00670/K01934%09red/K00600%09red/K01433%09red/K00605%09red/K00604%09red
Zeatin biosynthesis	KEGG PATHWAY	ko00908	4	70	0.551313	1	Cluster-20186.55810|Cluster-20186.44167|Cluster-20186.100036|Cluster-31845.2	http://www.genome.jp/kegg-bin/show_pathway?ko00908/K00279%09red/K00791%09red/K10760%09red
Glycosphingolipid biosynthesis - globo series	KEGG PATHWAY	ko00603	2	33	0.556737	1	Cluster-20186.14450|Cluster-20186.57338	http://www.genome.jp/kegg-bin/show_pathway?ko00603/K07407%09red/K01988%09red
Sphingolipid metabolism	KEGG PATHWAY	ko00600	8	151	0.603326	1	Cluster-20186.67969|Cluster-20186.28579|Cluster-20186.72778|Cluster-20186.57338|Cluster-20186.17983|Cluster-20186.56053|Cluster-20186.51243|Cluster-20186.55575	http://www.genome.jp/kegg-bin/show_pathway?ko00600/K04713%09red/K04712%09red/K17108%09red/K12349%09red/K07407%09red
Peroxisome	KEGG PATHWAY	ko04146	23	432	0.610748	1	Cluster-20186.54782|Cluster-20186.34306|Cluster-20186.20512|Cluster-20186.75535|Cluster-20186.50271|Cluster-20186.30687|Cluster-20186.75533|Cluster-20186.12998|Cluster-20186.55528|Cluster-20186.58657|Cluster-20186.55162|Cluster-20186.56183|Cluster-20186.55468|Cluster-20186.72973|Cluster-20186.35395|Cluster-20186.44697|Cluster-20186.60158|Cluster-20186.48912|Cluster-20186.48911|Cluster-20186.49604…	http://www.genome.jp/kegg-bin/show_pathway?ko04146/K03781%09red/K04564%09red/K13354%09red/K12663%09red/K11517%09red/K13348%09red/K04565%09red/K00232%09red/K00830%09red/K11147%09red/K01897%09red/K07513%09red
Fatty acid biosynthesis	KEGG PATHWAY	ko00061	9	171	0.611215	1	Cluster-20186.57603|Cluster-20186.60602|Cluster-20186.5083|Cluster-20186.65875|Cluster-20186.69260|Cluster-20186.53720|Cluster-20186.30687|Cluster-20186.62668|Cluster-20186.56724	http://www.genome.jp/kegg-bin/show_pathway?ko00061/K10781%09red/K01897%09red/K10782%09red/K03921%09red/K00208%09red
Pantothenate and CoA biosynthesis	KEGG PATHWAY	ko00770	6	116	0.626151	1	Cluster-20186.34666|Cluster-20186.72434|Cluster-20186.92283|Cluster-20186.43893|Cluster-20186.43891|Cluster-20186.43894	http://www.genome.jp/kegg-bin/show_pathway?ko00770/K01431%09red/K00826%09red/K02201%09red
Aminoacyl-tRNA biosynthesis	KEGG PATHWAY	ko00970	12	230	0.626216	1	Cluster-20186.69474|Cluster-20186.69750|Cluster-20186.96111|Cluster-20186.64314|Cluster-20186.69476|Cluster-20186.85867|Cluster-20186.28162|Cluster-20186.24153|Cluster-20186.69751|Cluster-20186.19226|Cluster-20186.77634|Cluster-20186.22383	http://www.genome.jp/kegg-bin/show_pathway?ko00970/K02434%09red/K02435%09red/K01883%09red/K01866%09red/K01867%09red/K01893%09red/K00604%09red
Stilbenoid, diarylheptanoid and gingerol biosynthesis	KEGG PATHWAY	ko00945	4	82	0.669904	1	Cluster-20186.32751|Cluster-20394.0|Cluster-20186.47120|Cluster-20186.69083	http://www.genome.jp/kegg-bin/show_pathway?ko00945/K13065%09red/K00517%09red
Taurine and hypotaurine metabolism	KEGG PATHWAY	ko00430	2	43	0.693381	1	Cluster-20186.54889|Cluster-20186.57107	http://www.genome.jp/kegg-bin/show_pathway?ko00430/K01580%09red
Cysteine and methionine metabolism	KEGG PATHWAY	ko00270	24	474	0.702275	1	Cluster-20186.21741|Cluster-20186.92283|Cluster-20186.23986|Cluster-20186.54765|Cluster-20186.55455|Cluster-20186.15150|Cluster-20186.74409|Cluster-20186.54891|Cluster-20186.12830|Cluster-20186.22356|Cluster-20186.92499|Cluster-20186.64094|Cluster-20186.50929|Cluster-20186.50927|Cluster-20186.58098|Cluster-20186.36086|Cluster-30976.1|Cluster-20186.58812|Cluster-20186.58811|Cluster-23506.0|Cluster…	http://www.genome.jp/kegg-bin/show_pathway?ko00270/K05933%09red/K00133%09red/K14454%09red/K00547%09red/K00928%09red/K01251%09red/K00640%09red/K01761%09red/K00827%09red/K00826%09red/K00815%09red/K00797%09red/K00789%09red/K13034%09red/K00026%09red/K00558%09red
DNA replication	KEGG PATHWAY	ko03030	9	186	0.70405	1	Cluster-20186.1550|Cluster-20186.58623|Cluster-20186.3271|Cluster-20186.16942|Cluster-20186.65544|Cluster-20186.28488|Cluster-20186.27141|Cluster-17667.0|Cluster-20186.104318	http://www.genome.jp/kegg-bin/show_pathway?ko03030/K02320%09red/K02209%09red/K10742%09red/K07466%09red/K02210%09red/K04802%09red/K02212%09red/K02541%09red/K02542%09red
Histidine metabolism	KEGG PATHWAY	ko00340	5	111	0.737169	1	Cluster-20186.90538|Cluster-20186.59104|Cluster-20186.56759|Cluster-20186.59245|Cluster-20186.75929	http://www.genome.jp/kegg-bin/show_pathway?ko00340/K00128%09red/K01590%09red/K14085%09red
Arachidonic acid metabolism	KEGG PATHWAY	ko00590	3	69	0.737981	1	Cluster-21409.0|Cluster-20186.62681|Cluster-20186.72458	http://www.genome.jp/kegg-bin/show_pathway?ko00590/K00432%09red/K01047%09red
Selenocompound metabolism	KEGG PATHWAY	ko00450	5	115	0.763519	1	Cluster-20186.92499|Cluster-20186.12830|Cluster-20186.57298|Cluster-20186.95786|Cluster-20186.37974	http://www.genome.jp/kegg-bin/show_pathway?ko00450/K01761%09red/K13811%09red/K08247%09red
Ribosome	KEGG PATHWAY	ko03010	94	1813	0.766227	1	Cluster-20186.102309|Cluster-18018.0|Cluster-20186.95790|Cluster-20186.49249|Cluster-20186.43528|Cluster-20186.52556|Cluster-20186.62395|Cluster-20186.100691|Cluster-20186.23005|Cluster-20186.55507|Cluster-20186.54676|Cluster-20186.96089|Cluster-28022.0|Cluster-20186.55009|Cluster-21632.0|Cluster-20186.44699|Cluster-20186.72749|Cluster-20186.4921|Cluster-20186.53301|Cluster-20186.54467|Cluster-20…	http://www.genome.jp/kegg-bin/show_pathway?ko03010/K02929%09red/K02937%09red/K02871%09red/K02917%09red/K02963%09red/K02912%09red/K02961%09red/K02880%09red/K02946%09red/K02915%09red/K02885%09red/K02952%09red/K02925%09red/K02889%09red/K02931%09red/K02930%09red/K02933%09red/K02918%09red/K02935%09red/K02888%09red/K02951%09red/K02936%09red/K02939%09red/K02938%09red/K02868%09red/K02881%09red/K02916%09r…
Folate biosynthesis	KEGG PATHWAY	ko00790	2	50	0.766803	1	Cluster-20186.26897|Cluster-20186.56130	http://www.genome.jp/kegg-bin/show_pathway?ko00790/K01930%09red/K03639%09red
Glycosaminoglycan degradation	KEGG PATHWAY	ko00531	3	73	0.770532	1	Cluster-20186.22423|Cluster-20186.304|Cluster-20186.34528	http://www.genome.jp/kegg-bin/show_pathway?ko00531/K10532%09red/K07964%09red
Brassinosteroid biosynthesis	KEGG PATHWAY	ko00905	2	51	0.775942	1	Cluster-20186.52590|Cluster-20186.52517	http://www.genome.jp/kegg-bin/show_pathway?ko00905/K09588%09red
Biotin metabolism	KEGG PATHWAY	ko00780	2	51	0.775942	1	Cluster-20186.18277|Cluster-20186.5083	http://www.genome.jp/kegg-bin/show_pathway?ko00780/K00208%09red/K01942%09red
Valine, leucine and isoleucine degradation	KEGG PATHWAY	ko00280	14	304	0.790412	1	Cluster-20186.75929|Cluster-20186.44490|Cluster-20186.59245|Cluster-20186.60158|Cluster-20186.90538|Cluster-20186.59104|Cluster-20186.92283|Cluster-20186.13180|Cluster-20186.13181|Cluster-20186.87702|Cluster-20186.58062|Cluster-20186.52795|Cluster-20186.20980|Cluster-20186.33823	http://www.genome.jp/kegg-bin/show_pathway?ko00280/K00140%09red/K00166%09red/K00128%09red/K00827%09red/K00826%09red/K00382%09red/K14085%09red/K00253%09red/K07513%09red/K01968%09red
Ether lipid metabolism	KEGG PATHWAY	ko00565	6	141	0.792049	1	Cluster-20186.79635|Cluster-20186.73260|Cluster-21409.0|Cluster-20186.89115|Cluster-20186.38251|Cluster-20186.17668	http://www.genome.jp/kegg-bin/show_pathway?ko00565/K01047%09red/K01114%09red/K00993%09red
Monoterpenoid biosynthesis	KEGG PATHWAY	ko00902	1	29	0.802875	1	Cluster-20186.77284	http://www.genome.jp/kegg-bin/show_pathway?ko00902/K15086%09red
C5-Branched dibasic acid metabolism	KEGG PATHWAY	ko00660	1	30	0.813267	1	Cluster-20186.34751	http://www.genome.jp/kegg-bin/show_pathway?ko00660/K01703%09red
Sulfur relay system	KEGG PATHWAY	ko04122	1	32	0.832437	1	Cluster-20186.26897	http://www.genome.jp/kegg-bin/show_pathway?ko04122/K03639%09red
Fatty acid degradation	KEGG PATHWAY	ko00071	11	264	0.86218	1	Cluster-20186.44347|Cluster-20186.30687|Cluster-20186.59245|Cluster-20186.60158|Cluster-20186.90538|Cluster-20186.59104|Cluster-20186.75929|Cluster-20186.20512|Cluster-20186.54903|Cluster-20186.56724|Cluster-20186.76069	http://www.genome.jp/kegg-bin/show_pathway?ko00071/K18857%09red/K00128%09red/K00232%09red/K14085%09red/K01897%09red/K00121%09red/K07513%09red
Pentose and glucuronate interconversions	KEGG PATHWAY	ko00040	11	270	0.879196	1	Cluster-20186.56381|Cluster-20186.74889|Cluster-20186.59245|Cluster-20186.53267|Cluster-20186.91067|Cluster-20186.91066|Cluster-20186.59104|Cluster-20186.48673|Cluster-20186.75929|Cluster-20186.31900|Cluster-20186.54111	http://www.genome.jp/kegg-bin/show_pathway?ko00040/K00128%09red/K01783%09red/K01728%09red/K00008%09red
Circadian rhythm - plant	KEGG PATHWAY	ko04712	11	274	0.889566	1	Cluster-20186.42543|Cluster-20186.42547|Cluster-20186.44009|Cluster-20186.80595|Cluster-20186.63499|Cluster-20186.59811|Cluster-20186.38222|Cluster-20186.32338|Cluster-20186.79557|Cluster-20186.63745|Cluster-20186.63743	http://www.genome.jp/kegg-bin/show_pathway?ko04712/K10143%09red/K16222%09red/K12119%09red/K12126%09red/K12125%09red/K00660%09red/K12129%09red
Butanoate metabolism	KEGG PATHWAY	ko00650	3	94	0.8911	1	Cluster-20186.56160|Cluster-20186.57107|Cluster-20186.54889	http://www.genome.jp/kegg-bin/show_pathway?ko00650/K18121%09red/K01580%09red
Phenylalanine metabolism	KEGG PATHWAY	ko00360	7	191	0.901561	1	Cluster-23506.0|Cluster-20186.60213|Cluster-20186.62755|Cluster-20186.27280|Cluster-20186.74159|Cluster-20186.36086|Cluster-20186.60996	http://www.genome.jp/kegg-bin/show_pathway?ko00360/K00276%09red/K14454%09red/K10775%09red/K00815%09red/K07253%09red/K01904%09red
Valine, leucine and isoleucine biosynthesis	KEGG PATHWAY	ko00290	2	71	0.902827	1	Cluster-20186.92283|Cluster-20186.34751	http://www.genome.jp/kegg-bin/show_pathway?ko00290/K00826%09red/K01703%09red
Purine metabolism	KEGG PATHWAY	ko00230	25	572	0.903948	1	Cluster-20186.58317|Cluster-20186.54242|Cluster-20186.27141|Cluster-20186.71824|Cluster-20186.71823|Cluster-20186.71822|Cluster-20186.61259|Cluster-20186.84098|Cluster-20186.35482|Cluster-20186.41350|Cluster-20186.84557|Cluster-20186.95786|Cluster-20186.37974|Cluster-20186.56621|Cluster-20186.85904|Cluster-20186.42663|Cluster-20186.46953|Cluster-20186.44370|Cluster-20186.50366|Cluster-20186.36644…	http://www.genome.jp/kegg-bin/show_pathway?ko00230/K10808%09red/K00939%09red/K01517%09red/K02320%09red/K13811%09red/K00759%09red/K03026%09red/K10807%09red/K00873%09red/K00940%09red/K01490%09red
Terpenoid backbone biosynthesis	KEGG PATHWAY	ko00900	7	195	0.911906	1	Cluster-18647.0|Cluster-20186.54331|Cluster-20186.58897|Cluster-20186.56143|Cluster-20186.56142|Cluster-20186.59346|Cluster-20186.21779	http://www.genome.jp/kegg-bin/show_pathway?ko00900/K13789%09red/K01770%09red/K10960%09red/K01662%09red/K00787%09red
Arginine and proline metabolism	KEGG PATHWAY	ko00330	10	266	0.920258	1	Cluster-20186.39481|Cluster-20186.59530|Cluster-20186.59245|Cluster-20186.90538|Cluster-20186.59104|Cluster-20186.75929|Cluster-20186.50927|Cluster-20186.49934|Cluster-20186.36086|Cluster-20186.50929	http://www.genome.jp/kegg-bin/show_pathway?ko00330/K14454%09red/K00294%09red/K00128%09red/K14085%09red/K00797%09red/K12657%09red
Other glycan degradation	KEGG PATHWAY	ko00511	4	128	0.921732	1	Cluster-20186.92419|Cluster-20186.28579|Cluster-20186.35121|Cluster-20186.17983	http://www.genome.jp/kegg-bin/show_pathway?ko00511/K17108%09red/K01227%09red/K15923%09red
Phagosome	KEGG PATHWAY	ko04145	25	586	0.924245	1	Cluster-20186.97443|Cluster-20186.54209|Cluster-20186.58147|Cluster-20186.37166|Cluster-20186.37167|Cluster-20186.60488|Cluster-20186.54945|Cluster-20186.70942|Cluster-20186.68207|Cluster-20186.51949|Cluster-20186.75333|Cluster-31888.0|Cluster-20186.58416|Cluster-20186.14879|Cluster-20186.56950|Cluster-20186.31792|Cluster-20186.49861|Cluster-20186.55860|Cluster-20186.39249|Cluster-20186.59637|Clu…	http://www.genome.jp/kegg-bin/show_pathway?ko04145/K08057%09red/K00914%09red/K10956%09red/K07374%09red/K07375%09red/K00921%09red/K07889%09red/K02152%09red
Citrate cycle (TCA cycle)	KEGG PATHWAY	ko00020	14	368	0.942967	1	Cluster-20186.50364|Cluster-20186.54626|Cluster-20186.55137|Cluster-20186.66371|Cluster-20186.50363|Cluster-20186.51044|Cluster-20186.20980|Cluster-20186.53793|Cluster-20186.54074|Cluster-20186.53333|Cluster-20186.74409|Cluster-20186.48714|Cluster-20186.58117|Cluster-20186.63133	http://www.genome.jp/kegg-bin/show_pathway?ko00020/K00162%09red/K01681%09red/K01648%09red/K01610%09red/K00382%09red/K00026%09red
Pyrimidine metabolism	KEGG PATHWAY	ko00240	15	414	0.967368	1	Cluster-20186.54231|Cluster-20186.45335|Cluster-20186.36644|Cluster-20186.68229|Cluster-20186.57219|Cluster-20186.84557|Cluster-20186.41350|Cluster-20186.52104|Cluster-20186.54242|Cluster-20186.43893|Cluster-28689.1|Cluster-20186.43891|Cluster-20186.31301|Cluster-20186.27141|Cluster-20186.43894	http://www.genome.jp/kegg-bin/show_pathway?ko00240/K16904%09red/K10808%09red/K02320%09red/K13421%09red/K00761%09red/K03026%09red/K01431%09red/K10807%09red/K00940%09red/K01937%09red/K09903%09red
Flavonoid biosynthesis	KEGG PATHWAY	ko00941	2	96	0.968063	1	Cluster-20186.44009|Cluster-20186.69083	http://www.genome.jp/kegg-bin/show_pathway?ko00941/K13065%09red/K00660%09red
Glycosylphosphatidylinositol(GPI)-anchor biosynthesis	KEGG PATHWAY	ko00563	3	130	0.973584	1	Cluster-20186.96666|Cluster-20186.52285|Cluster-20186.26651	http://www.genome.jp/kegg-bin/show_pathway?ko00563/K05310%09red/K05283%09red/K03857%09red
Cell cycle - Caulobacter	KEGG PATHWAY	ko04112	1	68	0.976182	1	Cluster-20186.96304	http://www.genome.jp/kegg-bin/show_pathway?ko04112/K03544%09red
Base excision repair	KEGG PATHWAY	ko03410	4	161	0.976584	1	Cluster-2691.0|Cluster-20186.78935|Cluster-20186.96880|Cluster-20186.58623	http://www.genome.jp/kegg-bin/show_pathway?ko03410/K01246%09red/K04802%09red/K10798%09red/K10802%09red
Nicotinate and nicotinamide metabolism	KEGG PATHWAY	ko00760	1	72	0.980826	1	Cluster-20186.39704	http://www.genome.jp/kegg-bin/show_pathway?ko00760/K18551%09red
Regulation of autophagy	KEGG PATHWAY	ko04140	5	195	0.981931	1	Cluster-20186.39249|Cluster-20186.21605|Cluster-20186.75770|Cluster-20186.75769|Cluster-20186.70733	http://www.genome.jp/kegg-bin/show_pathway?ko04140/K00914%09red/K08269%09red/K07198%09red
Ubiquitin mediated proteolysis	KEGG PATHWAY	ko04120	23	646	0.99056	1	Cluster-3349.0|Cluster-20186.1134|Cluster-20186.100236|Cluster-20186.56494|Cluster-20186.7659|Cluster-20186.5481|Cluster-20186.33185|Cluster-20186.10815|Cluster-20186.41827|Cluster-20186.29201|Cluster-20186.60768|Cluster-20186.89023|Cluster-20186.56165|Cluster-20186.46329|Cluster-20186.70409|Cluster-20186.56998|Cluster-20186.80625|Cluster-20186.56997|Cluster-20186.42543|Cluster-20186.42547|Cluste…	http://www.genome.jp/kegg-bin/show_pathway?ko04120/K04506%09red/K10143%09red/K06689%09red/K10144%09red/K10576%09red/K06688%09red/K10570%09red/K04706%09red/K03363%09red/K03364%09red
Protein export	KEGG PATHWAY	ko03060	4	188	0.991883	1	Cluster-20186.51949|Cluster-20186.57675|Cluster-20186.53797|Cluster-20186.55516	http://www.genome.jp/kegg-bin/show_pathway?ko03060/K03106%09red/K10956%09red/K09490%09red/K03217%09red
Mismatch repair	KEGG PATHWAY	ko03430	2	140	0.995956	1	Cluster-17667.0|Cluster-20186.58623	http://www.genome.jp/kegg-bin/show_pathway?ko03430/K04802%09red/K07466%09red
Oxidative phosphorylation	KEGG PATHWAY	ko00190	24	714	0.996788	1	Cluster-31836.0|Cluster-20186.101858|Cluster-20186.52265|Cluster-20186.46130|Cluster-31824.0|Cluster-20186.45219|Cluster-20186.54945|Cluster-20186.38049|Cluster-20186.56040|Cluster-20186.57444|Cluster-20186.54172|Cluster-20186.40928|Cluster-20186.62695|Cluster-20186.31042|Cluster-20186.31044|Cluster-20186.60062|Cluster-20186.55671|Cluster-20186.4943|Cluster-20186.57579|Cluster-20186.57215|Cluster…	http://www.genome.jp/kegg-bin/show_pathway?ko00190/K02113%09red/K02256%09red/K00417%09red/K02115%09red/K00412%09red/K03881%09red/K01507%09red/K01535%09red/K02109%09red/K02140%09red/K05582%09red/K02262%09red/K02152%09red/K00411%09red
Lysine degradation	KEGG PATHWAY	ko00310	4	213	0.997087	1	Cluster-20186.90538|Cluster-20186.59104|Cluster-20186.59245|Cluster-20186.75929	http://www.genome.jp/kegg-bin/show_pathway?ko00310/K00128%09red/K14085%09red
Homologous recombination	KEGG PATHWAY	ko03440	3	183	0.997303	1	Cluster-20186.32093|Cluster-17667.0|Cluster-20186.66987	http://www.genome.jp/kegg-bin/show_pathway?ko03440/K07466%09red/K10875%09red
RNA polymerase	KEGG PATHWAY	ko03020	1	112	0.997812	1	Cluster-28689.1	http://www.genome.jp/kegg-bin/show_pathway?ko03020/K03026%09red
N-Glycan biosynthesis	KEGG PATHWAY	ko00510	4	225	0.998241	1	Cluster-20186.29879|Cluster-6027.0|Cluster-20186.76662|Cluster-20186.51001	http://www.genome.jp/kegg-bin/show_pathway?ko00510/K07151%09red/K00737%09red/K01230%09red
Propanoate metabolism	KEGG PATHWAY	ko00640	3	199	0.998687	1	Cluster-20186.20980|Cluster-20186.87702|Cluster-20186.33823	http://www.genome.jp/kegg-bin/show_pathway?ko00640/K00140%09red/K00166%09red/K00382%09red
RNA degradation	KEGG PATHWAY	ko03018	14	514	0.998937	1	Cluster-20186.58702|Cluster-20186.59949|Cluster-20186.54321|Cluster-20186.21452|Cluster-20186.52928|Cluster-20186.53750|Cluster-20186.43489|Cluster-20186.48927|Cluster-20186.53015|Cluster-20186.66192|Cluster-20186.60678|Cluster-20186.53695|Cluster-9715.0|Cluster-20186.51225	http://www.genome.jp/kegg-bin/show_pathway?ko03018/K04077%09red/K12617%09red/K00850%09red/K13126%09red/K10643%09red
Plant-pathogen interaction	KEGG PATHWAY	ko04626	25	795	0.99926	1	Cluster-20186.21748|Cluster-20186.101267|Cluster-20186.101268|Cluster-20186.21747|Cluster-20186.80959|Cluster-20186.56122|Cluster-20186.86268|Cluster-20186.47736|Cluster-20186.93998|Cluster-20186.97290|Cluster-20186.59325|Cluster-20186.3816|Cluster-20186.84678|Cluster-20186.7457|Cluster-20186.98716|Cluster-20186.26244|Cluster-20186.53539|Cluster-20186.21493|Cluster-20186.67074|Cluster-20186.52332…	http://www.genome.jp/kegg-bin/show_pathway?ko04626/K13459%09red/K13412%09red/K04079%09red/K04368%09red/K18875%09red/K13448%09red/K13447%09red/K13420%09red/K13424%09red/K02183%09red
SNARE interactions in vesicular transport	KEGG PATHWAY	ko04130	1	150	0.999722	1	Cluster-20186.104639	http://www.genome.jp/kegg-bin/show_pathway?ko04130/K08486%09red
Nucleotide excision repair	KEGG PATHWAY	ko03420	3	233	0.999725	1	Cluster-20186.29201|Cluster-17667.0|Cluster-20186.58623	http://www.genome.jp/kegg-bin/show_pathway?ko03420/K04802%09red/K07466%09red/K10570%09red
Basal transcription factors	KEGG PATHWAY	ko03022	1	196	0.999977	1	Cluster-20186.51656	http://www.genome.jp/kegg-bin/show_pathway?ko03022/K03139%09red
Ribosome biogenesis in eukaryotes	KEGG PATHWAY	ko03008	4	356	0.999995	1	Cluster-5759.0|Cluster-20186.18055|Cluster-20186.55246|Cluster-12591.0	http://www.genome.jp/kegg-bin/show_pathway?ko03008/K14549%09red/K14557%09red/K07936%09red/K14563%09red
Endocytosis	KEGG PATHWAY	ko04144	21	929	0.999999	1	Cluster-20186.12236|Cluster-20186.26071|Cluster-20186.55122|Cluster-20186.62802|Cluster-20186.14879|Cluster-20186.92277|Cluster-20186.62252|Cluster-20186.78824|Cluster-20186.17258|Cluster-20186.91759|Cluster-20186.549|Cluster-20186.46195|Cluster-20186.50954|Cluster-20186.3977|Cluster-20186.105501|Cluster-20186.5425|Cluster-20186.25381|Cluster-20186.49059|Cluster-20186.36544|Cluster-20186.97445|Cl…	http://www.genome.jp/kegg-bin/show_pathway?ko04144/K01528%09red/K12184%09red/K11866%09red/K07889%09red/K00889%09red/K07937%09red/K19366%09red/K07904%09red/K19476%09red/K03283%09red
Protein processing in endoplasmic reticulum	KEGG PATHWAY	ko04141	27	1150	1	1	Cluster-4538.0|Cluster-20186.97445|Cluster-20186.101267|Cluster-20186.101268|Cluster-20186.3977|Cluster-20186.21828|Cluster-20186.57675|Cluster-20186.42718|Cluster-6027.0|Cluster-20186.36544|Cluster-20186.76662|Cluster-20186.51949|Cluster-25726.0|Cluster-20186.5425|Cluster-20186.60768|Cluster-31888.0|Cluster-20186.55979|Cluster-20186.7457|Cluster-20186.70409|Cluster-20186.79393|Cluster-20186.7665…	http://www.genome.jp/kegg-bin/show_pathway?ko04141/K08057%09red/K06689%09red/K01230%09red/K10084%09red/K10666%09red/K13993%09red/K09580%09red/K07151%09red/K09490%09red/K08852%09red/K04079%09red/K09523%09red/K14012%09red/K14006%09red/K10956%09red/K03283%09red
Proteasome	KEGG PATHWAY	ko03050	2	373	1	1	Cluster-20186.87122|Cluster-20186.28936	http://www.genome.jp/kegg-bin/show_pathway?ko03050/K06700%09red
RNA transport	KEGG PATHWAY	ko03013	14	860	1	1	Cluster-20186.90497|Cluster-20186.58702|Cluster-20186.59949|Cluster-20186.54321|Cluster-20186.4771|Cluster-12591.0|Cluster-20186.53454|Cluster-20186.88567|Cluster-20186.70167|Cluster-20186.53015|Cluster-20186.57473|Cluster-20186.18166|Cluster-20186.15657|Cluster-20186.30690	http://www.genome.jp/kegg-bin/show_pathway?ko03013/K14300%09red/K18213%09red/K03231%09red/K07936%09red/K03257%09red/K00784%09red/K13126%09red
mRNA surveillance pathway	KEGG PATHWAY	ko03015	10	754	1	1	Cluster-20186.91201|Cluster-20186.8759|Cluster-20186.59949|Cluster-20186.54321|Cluster-20186.58702|Cluster-20186.39468|Cluster-20186.60271|Cluster-20186.44284|Cluster-20186.53015|Cluster-20186.14575	http://www.genome.jp/kegg-bin/show_pathway?ko03015/K04354%09red/K11584%09red/K14411%09red/K06269%09red/K14397%09red/K13126%09red
Spliceosome	KEGG PATHWAY	ko03040	13	925	1	1	Cluster-20186.41914|Cluster-20186.67663|Cluster-20186.74170|Cluster-20186.67662|Cluster-20186.68231|Cluster-20186.20463|Cluster-20186.48279|Cluster-20186.5425|Cluster-20186.3977|Cluster-20186.36544|Cluster-20186.60987|Cluster-20186.97445|Cluster-20186.70414	http://www.genome.jp/kegg-bin/show_pathway?ko03040/K12741%09red/K12837%09red/K12823%09red/K12900%09red/K12897%09red/K12890%09red/K12893%09red/K03283%09red

## Sheet: RvsC.DEG_KEGG_pathway_enrichmen
#Term	Database	ID	Input number	Background number	P-Value	Corrected P-Value	Input	Hyperlink
Starch and sucrose metabolism	KEGG PATHWAY	ko00500	18	735	8.17077e-07	5.39271e-05	Cluster-20186.31153|Cluster-20186.41395|Cluster-20186.55239|Cluster-20186.28445|Cluster-20186.44816|Cluster-20186.16990|Cluster-20186.26919|Cluster-20186.55821|Cluster-20186.88349|Cluster-20186.32978|Cluster-20186.52952|Cluster-20186.51774|Cluster-20186.51777|Cluster-20186.51776|Cluster-20186.45011|Cluster-20186.43887|Cluster-20186.32974|Cluster-20186.45058	http://www.genome.jp/kegg-bin/show_pathway?ko00500/K01193%09red/K13648%09red/K01177%09red/K00700%09red/K01188%09red/K16055%09red/K01051%09red/K05350%09red/K00696%09red
Cutin, suberine and wax biosynthesis	KEGG PATHWAY	ko00073	4	87	0.00227981	0.0752337	Cluster-20186.55803|Cluster-20186.50456|Cluster-20186.54018|Cluster-20186.104414	http://www.genome.jp/kegg-bin/show_pathway?ko00073/K17991%09red/K13356%09red/K15404%09red
Ascorbate and aldarate metabolism	KEGG PATHWAY	ko00053	5	186	0.0061808	0.106045	Cluster-20186.59990|Cluster-20186.24669|Cluster-20186.58808|Cluster-20186.77781|Cluster-20186.60712	http://www.genome.jp/kegg-bin/show_pathway?ko00053/K00128%09red/K08232%09red/K00469%09red
Circadian rhythm - plant	KEGG PATHWAY	ko04712	6	274	0.00725753	0.106045	Cluster-20186.57131|Cluster-20186.64921|Cluster-20186.33787|Cluster-20186.53413|Cluster-20186.79557|Cluster-20186.58102	http://www.genome.jp/kegg-bin/show_pathway?ko04712/K12116%09red/K12125%09red/K12124%09red
Cyanoamino acid metabolism	KEGG PATHWAY	ko00460	4	135	0.0101665	0.106045	Cluster-20186.31153|Cluster-20186.41395|Cluster-20186.16990|Cluster-20186.28445	http://www.genome.jp/kegg-bin/show_pathway?ko00460/K01188%09red/K05350%09red
Glycerophospholipid metabolism	KEGG PATHWAY	ko00564	8	491	0.0111955	0.106045	Cluster-20186.32443|Cluster-20186.92010|Cluster-20186.8753|Cluster-20186.39275|Cluster-20186.100244|Cluster-20186.79635|Cluster-20186.92013|Cluster-20186.84051	http://www.genome.jp/kegg-bin/show_pathway?ko00564/K00006%09red/K18696%09red/K00993%09red/K01115%09red/K14156%09red/K13513%09red
Phenylpropanoid biosynthesis	KEGG PATHWAY	ko00940	7	394	0.0112472	0.106045	Cluster-20186.31153|Cluster-20186.41395|Cluster-20186.28445|Cluster-20186.47984|Cluster-20186.47982|Cluster-20186.57927|Cluster-20186.16990	http://www.genome.jp/kegg-bin/show_pathway?ko00940/K01188%09red/K05350%09red/K00083%09red/K13066%09red
Plant hormone signal transduction	KEGG PATHWAY	ko04075	13	1204	0.0337289	0.278263	Cluster-20186.3047|Cluster-20186.1753|Cluster-20186.58547|Cluster-20186.54205|Cluster-20186.62827|Cluster-20186.53898|Cluster-20186.40182|Cluster-20186.49846|Cluster-20186.49660|Cluster-20186.71223|Cluster-20186.94617|Cluster-20186.49884|Cluster-20186.59543	http://www.genome.jp/kegg-bin/show_pathway?ko04075/K14497%09red/K14496%09red/K14432%09red/K14484%09red/K14514%09red/K14515%09red
Glycerolipid metabolism	KEGG PATHWAY	ko00561	5	303	0.0394625	0.289391	Cluster-20186.59990|Cluster-20186.3634|Cluster-20186.4322|Cluster-20186.3633|Cluster-20186.84051	http://www.genome.jp/kegg-bin/show_pathway?ko00561/K00128%09red/K13513%09red/K03715%09red
Carotenoid biosynthesis	KEGG PATHWAY	ko00906	3	129	0.0460288	0.30379	Cluster-20186.82916|Cluster-20186.97921|Cluster-20186.53886	http://www.genome.jp/kegg-bin/show_pathway?ko00906/K09840%09red/K15747%09red/K09842%09red
Ether lipid metabolism	KEGG PATHWAY	ko00565	3	141	0.0568708	0.341225	Cluster-20186.39275|Cluster-20186.79635|Cluster-20186.100244	http://www.genome.jp/kegg-bin/show_pathway?ko00565/K00993%09red/K01115%09red
Sphingolipid metabolism	KEGG PATHWAY	ko00600	3	151	0.0667439	0.367091	Cluster-20186.39409|Cluster-20186.60886|Cluster-20186.55575	http://www.genome.jp/kegg-bin/show_pathway?ko00600/K04713%09red/K17108%09red
Alanine, aspartate and glutamate metabolism	KEGG PATHWAY	ko00250	4	261	0.0772601	0.392243	Cluster-20186.30820|Cluster-20186.48797|Cluster-20186.75863|Cluster-20186.36086	http://www.genome.jp/kegg-bin/show_pathway?ko00250/K14454%09red/K00764%09red/K00264%09red
Pentose and glucuronate interconversions	KEGG PATHWAY	ko00040	4	270	0.0848758	0.400129	Cluster-20186.59990|Cluster-20186.59022|Cluster-20186.45058|Cluster-20186.54287	http://www.genome.jp/kegg-bin/show_pathway?ko00040/K00128%09red/K01051%09red/K00008%09red
Fructose and mannose metabolism	KEGG PATHWAY	ko00051	4	345	0.160973	0.708282	Cluster-20186.54576|Cluster-20186.55074|Cluster-20186.59022|Cluster-20186.54287	http://www.genome.jp/kegg-bin/show_pathway?ko00051/K01809%09red/K01623%09red/K00008%09red
Inositol phosphate metabolism	KEGG PATHWAY	ko00562	4	360	0.1785	0.719026	Cluster-20186.60712|Cluster-20186.24669|Cluster-20186.66194|Cluster-20186.77781	http://www.genome.jp/kegg-bin/show_pathway?ko00562/K00469%09red/K00913%09red
Other glycan degradation	KEGG PATHWAY	ko00511	2	128	0.185204	0.719026	Cluster-20186.39409|Cluster-20186.65159	http://www.genome.jp/kegg-bin/show_pathway?ko00511/K17108%09red/K15923%09red
Nitrogen metabolism	KEGG PATHWAY	ko00910	2	144	0.220304	0.770773	Cluster-20186.55568|Cluster-20186.48797	http://www.genome.jp/kegg-bin/show_pathway?ko00910/K10534%09red/K00264%09red
Arginine and proline metabolism	KEGG PATHWAY	ko00330	3	266	0.221889	0.770773	Cluster-20186.80687|Cluster-20186.59990|Cluster-20186.36086	http://www.genome.jp/kegg-bin/show_pathway?ko00330/K00128%09red/K01426%09red/K14454%09red
Amino sugar and nucleotide sugar metabolism	KEGG PATHWAY	ko00520	5	543	0.237067	0.782321	Cluster-20186.54909|Cluster-20186.58874|Cluster-20186.26919|Cluster-20186.54576|Cluster-20186.38469	http://www.genome.jp/kegg-bin/show_pathway?ko00520/K01809%09red/K01183%09red/K13648%09red/K12446%09red
Tryptophan metabolism	KEGG PATHWAY	ko00380	2	170	0.278216	0.82466	Cluster-20186.80687|Cluster-20186.59990	http://www.genome.jp/kegg-bin/show_pathway?ko00380/K00128%09red/K01426%09red
Sesquiterpenoid and triterpenoid biosynthesis	KEGG PATHWAY	ko00909	1	57	0.296253	0.82466	Cluster-20186.20171	http://www.genome.jp/kegg-bin/show_pathway?ko00909/K14173%09red
Carbon fixation in photosynthetic organisms	KEGG PATHWAY	ko00710	4	466	0.315642	0.82466	Cluster-20186.36086|Cluster-20186.53793|Cluster-20186.55074|Cluster-20186.63133	http://www.genome.jp/kegg-bin/show_pathway?ko00710/K01623%09red/K01610%09red/K14454%09red
Protein export	KEGG PATHWAY	ko03060	2	188	0.318238	0.82466	Cluster-20186.63129|Cluster-20186.42839	http://www.genome.jp/kegg-bin/show_pathway?ko03060/K03110%09red
Tyrosine metabolism	KEGG PATHWAY	ko00350	2	191	0.324866	0.82466	Cluster-20186.36086|Cluster-20186.35030	http://www.genome.jp/kegg-bin/show_pathway?ko00350/K01800%09red/K14454%09red
Phenylalanine metabolism	KEGG PATHWAY	ko00360	2	191	0.324866	0.82466	Cluster-20186.80687|Cluster-20186.36086	http://www.genome.jp/kegg-bin/show_pathway?ko00360/K01426%09red/K14454%09red
N-Glycan biosynthesis	KEGG PATHWAY	ko00510	2	225	0.398496	0.868261	Cluster-20186.75911|Cluster-20186.87999	http://www.genome.jp/kegg-bin/show_pathway?ko00510/K00737%09red/K07441%09red
Limonene and pinene degradation	KEGG PATHWAY	ko00903	1	83	0.39893	0.868261	Cluster-20186.59990	http://www.genome.jp/kegg-bin/show_pathway?ko00903/K00128%09red
Isoquinoline alkaloid biosynthesis	KEGG PATHWAY	ko00950	1	95	0.441151	0.868261	Cluster-20186.36086	http://www.genome.jp/kegg-bin/show_pathway?ko00950/K14454%09red
Tropane, piperidine and pyridine alkaloid biosynthesis	KEGG PATHWAY	ko00960	1	97	0.447895	0.868261	Cluster-20186.36086	http://www.genome.jp/kegg-bin/show_pathway?ko00960/K14454%09red
Fatty acid degradation	KEGG PATHWAY	ko00071	2	264	0.478089	0.868261	Cluster-20186.59990|Cluster-20186.70922	http://www.genome.jp/kegg-bin/show_pathway?ko00071/K00128%09red/K00232%09red
Histidine metabolism	KEGG PATHWAY	ko00340	1	111	0.492891	0.868261	Cluster-20186.59990	http://www.genome.jp/kegg-bin/show_pathway?ko00340/K00128%09red
Endocytosis	KEGG PATHWAY	ko04144	6	929	0.497129	0.868261	Cluster-20186.69132|Cluster-20186.39868|Cluster-20186.46195|Cluster-20186.29421|Cluster-20186.47969|Cluster-20186.100244	http://www.genome.jp/kegg-bin/show_pathway?ko04144/K12486%09red/K01528%09red/K01115%09red/K18443%09red/K07904%09red
Sulfur metabolism	KEGG PATHWAY	ko00920	1	127	0.539864	0.868261	Cluster-20186.13936	http://www.genome.jp/kegg-bin/show_pathway?ko00920/K00860%09red
Glycosylphosphatidylinositol(GPI)-anchor biosynthesis	KEGG PATHWAY	ko00563	1	130	0.548177	0.868261	Cluster-20186.36832	http://www.genome.jp/kegg-bin/show_pathway?ko00563/K05285%09red
Cysteine and methionine metabolism	KEGG PATHWAY	ko00270	3	474	0.551131	0.868261	Cluster-20186.36086|Cluster-20186.20087|Cluster-20186.25564	http://www.genome.jp/kegg-bin/show_pathway?ko00270/K05933%09red/K14454%09red
Valine, leucine and isoleucine degradation	KEGG PATHWAY	ko00280	2	304	0.552754	0.868261	Cluster-20186.63194|Cluster-20186.59990	http://www.genome.jp/kegg-bin/show_pathway?ko00280/K00128%09red/K00167%09red
Pyruvate metabolism	KEGG PATHWAY	ko00620	3	485	0.566589	0.868261	Cluster-20186.59990|Cluster-20186.53793|Cluster-20186.63133	http://www.genome.jp/kegg-bin/show_pathway?ko00620/K00128%09red/K01610%09red
Mismatch repair	KEGG PATHWAY	ko03430	1	140	0.574823	0.868261	Cluster-17626.0	http://www.genome.jp/kegg-bin/show_pathway?ko03430/K08739%09red
Pentose phosphate pathway	KEGG PATHWAY	ko00030	2	334	0.603645	0.868261	Cluster-20186.55074|Cluster-20186.37846	http://www.genome.jp/kegg-bin/show_pathway?ko00030/K01623%09red/K01057%09red
Porphyrin and chlorophyll metabolism	KEGG PATHWAY	ko00860	1	155	0.611888	0.868261	Cluster-20186.46237	http://www.genome.jp/kegg-bin/show_pathway?ko00860/K01845%09red
Glycolysis / Gluconeogenesis	KEGG PATHWAY	ko00010	4	703	0.619989	0.868261	Cluster-20186.59990|Cluster-20186.53793|Cluster-20186.55074|Cluster-20186.63133	http://www.genome.jp/kegg-bin/show_pathway?ko00010/K00128%09red/K01623%09red/K01610%09red
Biosynthesis of unsaturated fatty acids	KEGG PATHWAY	ko01040	1	161	0.625797	0.868261	Cluster-20186.70922	http://www.genome.jp/kegg-bin/show_pathway?ko01040/K00232%09red
Arginine biosynthesis	KEGG PATHWAY	ko00220	1	165	0.634794	0.868261	Cluster-20186.36086	http://www.genome.jp/kegg-bin/show_pathway?ko00220/K14454%09red
Ribosome biogenesis in eukaryotes	KEGG PATHWAY	ko03008	2	356	0.638121	0.868261	Cluster-20186.74433|Cluster-20186.90675	http://www.genome.jp/kegg-bin/show_pathway?ko03008/K14569%09red
Phenylalanine, tyrosine and tryptophan biosynthesis	KEGG PATHWAY	ko00400	1	168	0.6414	0.868261	Cluster-20186.36086	http://www.genome.jp/kegg-bin/show_pathway?ko00400/K14454%09red
Citrate cycle (TCA cycle)	KEGG PATHWAY	ko00020	2	368	0.655918	0.868261	Cluster-20186.53793|Cluster-20186.63133	http://www.genome.jp/kegg-bin/show_pathway?ko00020/K01610%09red
Purine metabolism	KEGG PATHWAY	ko00230	3	572	0.676832	0.868261	Cluster-20186.30820|Cluster-20186.75863|Cluster-20186.13936	http://www.genome.jp/kegg-bin/show_pathway?ko00230/K00860%09red/K00764%09red
DNA replication	KEGG PATHWAY	ko03030	1	186	0.678612	0.868261	Cluster-20186.65544	http://www.genome.jp/kegg-bin/show_pathway?ko03030/K10742%09red
alpha-Linolenic acid metabolism	KEGG PATHWAY	ko00592	1	194	0.693892	0.868261	Cluster-20186.70922	http://www.genome.jp/kegg-bin/show_pathway?ko00592/K00232%09red
Basal transcription factors	KEGG PATHWAY	ko03022	1	196	0.697598	0.868261	Cluster-20186.66350	http://www.genome.jp/kegg-bin/show_pathway?ko03022/K03122%09red
Propanoate metabolism	KEGG PATHWAY	ko00640	1	199	0.703074	0.868261	Cluster-20186.63194	http://www.genome.jp/kegg-bin/show_pathway?ko00640/K00167%09red
Lysine degradation	KEGG PATHWAY	ko00310	1	213	0.727349	0.868261	Cluster-20186.59990	http://www.genome.jp/kegg-bin/show_pathway?ko00310/K00128%09red
Peroxisome	KEGG PATHWAY	ko04146	2	432	0.739276	0.868261	Cluster-20186.70922|Cluster-20186.104414	http://www.genome.jp/kegg-bin/show_pathway?ko04146/K13356%09red/K00232%09red
Ubiquitin mediated proteolysis	KEGG PATHWAY	ko04120	3	646	0.75325	0.868261	Cluster-20186.5370|Cluster-20186.75212|Cluster-20186.56494	http://www.genome.jp/kegg-bin/show_pathway?ko04120/K03348%09red/K10144%09red/K10609%09red
Aminoacyl-tRNA biosynthesis	KEGG PATHWAY	ko00970	1	230	0.754187	0.868261	Cluster-20186.72377	http://www.genome.jp/kegg-bin/show_pathway?ko00970/K01876%09red
Nucleotide excision repair	KEGG PATHWAY	ko03420	1	233	0.758642	0.868261	Cluster-20186.75212	http://www.genome.jp/kegg-bin/show_pathway?ko03420/K10609%09red
beta-Alanine metabolism	KEGG PATHWAY	ko00410	1	236	0.763017	0.868261	Cluster-20186.59990	http://www.genome.jp/kegg-bin/show_pathway?ko00410/K00128%09red
Galactose metabolism	KEGG PATHWAY	ko00052	1	251	0.783738	0.876723	Cluster-20186.44816	http://www.genome.jp/kegg-bin/show_pathway?ko00052/K01193%09red
RNA transport	KEGG PATHWAY	ko03013	3	860	0.895748	0.985323	Cluster-20186.64623|Cluster-20186.93195|Cluster-20186.15657	http://www.genome.jp/kegg-bin/show_pathway?ko03013/K03242%09red/K14328%09red/K00784%09red
Protein processing in endoplasmic reticulum	KEGG PATHWAY	ko04141	4	1150	0.920806	0.996282	Cluster-20186.44560|Cluster-20186.52925|Cluster-20186.52259|Cluster-20186.55979	http://www.genome.jp/kegg-bin/show_pathway?ko04141/K09523%09red/K10636%09red/K10666%09red/K08852%09red
Plant-pathogen interaction	KEGG PATHWAY	ko04626	2	795	0.954954	0.999988	Cluster-20186.61910|Cluster-20186.86268	http://www.genome.jp/kegg-bin/show_pathway?ko04626/K13420%09red/K04368%09red
Phagosome	KEGG PATHWAY	ko04145	1	586	0.972299	0.999988	Cluster-20186.29185	http://www.genome.jp/kegg-bin/show_pathway?ko04145/K07374%09red
mRNA surveillance pathway	KEGG PATHWAY	ko03015	1	754	0.990199	0.999988	Cluster-20186.93195	http://www.genome.jp/kegg-bin/show_pathway?ko03015/K14328%09red
Spliceosome	KEGG PATHWAY	ko03040	1	925	0.996616	0.999988	Cluster-20186.46654	http://www.genome.jp/kegg-bin/show_pathway?ko03040/K12828%09red
Ribosome	KEGG PATHWAY	ko03010	1	1813	0.999988	0.999988	Cluster-20186.60194	http://www.genome.jp/kegg-bin/show_pathway?ko03010/K02931%09red
